# Supplementary material for: A Meta-Analysis on Degraded Alpine Grassland Mediated by Climate Factors: Enlightenment for Ecological Restoration
Source: Front Plant Sci. 2022 Jan 7;12:821954. doi: 10.3389/fpls.2021.821954 (PMC8777074; doi:10.3389/fpls.2021.821954)
Supplement: Supplementary file 2 [file Table_1.XLSX]

## Sheet: source data
0	Observation	Research	PublicationShort	Longitude	Latitude	Degradation	Type	Depth	Coverage	Coverage_var	AGB	AGB_var	BGB	BGB_var	Shannon	Shannon_var	BD	BD_var	pH	pH_var	pH_Change	SM	SM_var	Sand	Sand_var	Silt	Silt_var	Clay	Clay_var	SOC	SOC_var	TN	TN_var	TP	TP_var	AN	AN_var	AP	AP_var	AK	AK_var	CN	CN_var	AMN	AMN_var	NN	NN_var	MBC	MBC_var
1	1	1	Bacterial richness is negatively related to potential soil multifunctiolity in a degraded alpine meadow	91.0833	30.85	LD	meadow	0–15	-0.12658	0.000103848	NA	NA	NA	NA	NA	NA	NA	NA	0.0336423	1.18101e-05	0.22	-0.0203338	0.000635027	NA	NA	NA	NA	NA	NA	-0.541968	0.0023447	NA	NA	NA	NA	NA	NA	-0.112987	0.00182938	NA	NA	NA	NA	-0.439763	0.00164204	-0.590475	0.00068374	NA	NA
2	2	1	Bacterial richness is negatively related to potential soil multifunctiolity _x000D_ in a degraded alpine meadow	91.0833	30.85	MD	meadow	0–15	-0.241355	7.43654e-05	NA	NA	NA	NA	NA	NA	NA	NA	0.0530026	9.4801e-06	0.35	-0.239878	0.000712016	NA	NA	NA	NA	NA	NA	-0.907428	0.00233029	NA	NA	NA	NA	NA	NA	-0.256824	0.00127537	NA	NA	NA	NA	-0.791043	0.00134921	-1.10085	0.000386824	NA	NA
3	3	1	Bacterial richness is negatively related to potential soil multifunctiolity _x000D_ in a degraded alpine meadow	91.0833	30.85	HD	meadow	0–15	-0.871654	0.000456179	NA	NA	NA	NA	NA	NA	NA	NA	0.0705469	2.83237e-05	0.47	-0.409757	0.000610113	NA	NA	NA	NA	NA	NA	-1.1196	0.00349612	NA	NA	NA	NA	NA	NA	-0.542666	0.00115291	NA	NA	NA	NA	-0.894296	0.000783759	-1.4486	0.000259363	NA	NA
4	4	2	Changes in the soil microbial communities of alpine steppe at_x000D_ Qinghai-Tibetan Plateau under different degradation levels	96.935	34.012	LD	steppe	0-10	-0.212561	0.00998731	0.194869	0.0514169	NA	NA	0.074108	0.0255054	0.238085	0.0091845	-0.029975	0.00236434	-0.22	-0.108353	0.00271365	NA	NA	NA	NA	NA	NA	0.188808	0.174144	-0.443205	0.0722546	0.0363676	0.0114433	NA	NA	NA	NA	NA	NA	NA	NA	0.610559	0.00523717	-0.257084	0.21854	NA	NA
5	5	2	Changes in the soil microbial communities of alpine steppe at_x000D_ Qinghai-Tibetan Plateau under different degradation levels	96.935	34.012	MD	steppe	0-10	-0.2948	0.01654	-0.114153	0.103901	NA	NA	0	0.109112	0.423228	0.00809547	0.0446268	0.00254104	0.34	-0.698868	0.0285312	NA	NA	NA	NA	NA	NA	-0.104801	0.077031	-1.02715	0.0287796	-0.160343	0.0104637	NA	NA	NA	NA	NA	NA	NA	NA	-0.103269	0.133005	-0.44657	0.167257	NA	NA
6	6	2	Changes in the soil microbial communities of alpine steppe at_x000D_ Qinghai-Tibetan Plateau under different degradation levels	96.935	34.012	HD	steppe	0-10	-0.796146	0.2129	-0.379443	0.106127	NA	NA	-0.242562	0.110174	0.350202	0.00847761	0.00401876	0.00127044	0.03	0.150301	0.0190568	NA	NA	NA	NA	NA	NA	-0.560088	0.0709603	-0.300105	0.0197546	-0.0377403	0.0119018	NA	NA	NA	NA	NA	NA	NA	NA	-0.0775363	0.0146553	-0.337468	0.168201	NA	NA
7	7	2	Changes in the soil microbial communities of alpine steppe at_x000D_ Qinghai-Tibetan Plateau under different degradation levels	96.935	34.012	ED	steppe	0-10	-1.34055	0.0640516	-0.520468	0.11273	NA	NA	-0.916291	0.739645	0.573346	0.00698771	0.00935211	0.0016945	0.07	-0.348443	0.00393805	NA	NA	NA	NA	NA	NA	-0.575644	0.0641989	-0.633249	0.0102954	-0.0571584	0.00860543	NA	NA	NA	NA	NA	NA	NA	NA	-0.167319	0.0962148	-0.394216	0.171564	NA	NA
8	8	3	Changes of soil properties regulate the soil organic carbon loss with_x000D_ grassland degradation on the Qinghai-Tibet Plateau	90.6	39.6833	HD	meadow	0-10	NA	NA	NA	NA	-1.72165	0.0645929	NA	NA	0.371064	0.00157707	NA	NA	NA	-0.561619	0.0115533	NA	NA	NA	NA	NA	NA	-0.53013	0.0102046	NA	NA	NA	NA	NA	NA	NA	NA	NA	NA	NA	NA	NA	NA	NA	NA	NA	NA
9	9	3	Changes of soil properties regulate the soil organic carbon loss with_x000D_ grassland degradation on the Qinghai-Tibet Plateau	90.6	39.6833	ED	meadow	0-10	NA	NA	NA	NA	-2.47934	0.45897	NA	NA	0.449567	0.00179944	NA	NA	NA	-0.639597	0.0176125	NA	NA	NA	NA	NA	NA	-0.651627	0.0162321	NA	NA	NA	NA	NA	NA	NA	NA	NA	NA	NA	NA	NA	NA	NA	NA	NA	NA
10	10	4	Comparison of three models ftting _x000D_ the soil water retention curves in a _x000D_ degraded alpine meadow region	102.213	33.7744	MD	meadow	0-10	-0.298925	0.00312893	-0.72738	0.0439895	-0.108001	0.00228394	NA	NA	0.166127	0.00479741	NA	NA	NA	NA	NA	0.0296318	0.0248623	-0.0534887	0.143385	-0.318454	0.584194	-0.254423	0.0241395	NA	NA	NA	NA	NA	NA	NA	NA	NA	NA	NA	NA	NA	NA	NA	NA	NA	NA
11	11	4	Comparison of three models ftting _x000D_ the soil water retention curves in a _x000D_ degraded alpine meadow region	102.213	33.7744	ED	meadow	0-10	-1.77086	0.132586	-2.07944	0.191061	-0.936978	0.00405292	NA	NA	0.272507	0.00354562	NA	NA	NA	NA	NA	0.178555	0.0201694	-0.594056	0.15685	-1.70475	1.14669	-1.3749	0.128402	NA	NA	NA	NA	NA	NA	NA	NA	NA	NA	NA	NA	NA	NA	NA	NA	NA	NA
12	12	5	Degradation induces changes in the soil C:N:P _x000D_ stoichiometry of alpine steppe on the Tibetan Plateau	88.7	30.95	LD	steppe	0-30	-0.189305	0.00666667	NA	NA	NA	NA	NA	NA	NA	NA	0.00579712	2.69793e-05	0.05	-0.0785007	0.00685001	NA	NA	NA	NA	NA	NA	NA	NA	-0.285287	0.022796	0.117783	0.0162519	NA	NA	NA	NA	NA	NA	-0.117783	0.0316288	NA	NA	NA	NA	NA	NA
13	13	5	Degradation induces changes in the soil C:N:P _x000D_ stoichiometry of alpine steppe on the Tibetan Plateau	88.7	30.95	MD	steppe	0-30	-0.372103	0.00666667	NA	NA	NA	NA	NA	NA	NA	NA	0.0195746	3.33349e-05	0.17	-0.187463	0.0046634	NA	NA	NA	NA	NA	NA	NA	NA	-0.185203	0.0282632	0.223144	0.0139063	NA	NA	NA	NA	NA	NA	-0.209032	0.031016	NA	NA	NA	NA	NA	NA
14	14	5	Degradation induces changes in the soil C:N:P _x000D_ stoichiometry of alpine steppe on the Tibetan Plateau	88.7	30.95	HD	steppe	0-30	-0.604417	0.00666667	NA	NA	NA	NA	NA	NA	NA	NA	0.0241252	5.38431e-05	0.21	-0.168739	0.00637627	NA	NA	NA	NA	NA	NA	NA	NA	-0.189542	0.0294453	0.362905	0.0114677	NA	NA	NA	NA	NA	NA	-0.328408	0.0310776	NA	NA	NA	NA	NA	NA
15	15	5	Degradation induces changes in the soil C:N:P _x000D_ stoichiometry of alpine steppe on the Tibetan Plateau	88.7	30.95	ED	steppe	0-30	-1.0715	0.00666667	NA	NA	NA	NA	NA	NA	NA	NA	0.0252597	2.67752e-05	0.22	-0.462624	0.00528649	NA	NA	NA	NA	NA	NA	NA	NA	-0.273396	0.021334	0.318454	0.0225013	NA	NA	NA	NA	NA	NA	-0.463992	0.0307297	NA	NA	NA	NA	NA	NA
16	16	6	Degradation leads to dramatic decrease in topsoil but _x000D_ not subsoil root biomass in an alpine meadow on the _x000D_ Tibetan Plateau, Chi	101.5	32.3333	LD	meadow	0-10	-0.131928	0.00506923	NA	NA	NA	NA	NA	NA	-0.104513	0.0408473	NA	NA	NA	0.131273	0.118795	NA	NA	NA	NA	NA	NA	-0.14842	0.0414614	0.134819	0.0844623	-0.0289875	0.0384888	-0.0111091	0.0788416	0.161944	0.0456506	NA	NA	NA	NA	NA	NA	NA	NA	NA	NA
17	17	6	Degradation leads to dramatic decrease in topsoil but _x000D_ not subsoil root biomass in an alpine meadow on the _x000D_ Tibetan Plateau, Chi	101.5	32.3333	MD	meadow	0-10	-0.283944	0.00715902	NA	NA	NA	NA	NA	NA	0.0226425	0.0042476	NA	NA	NA	-0.385868	0.0917069	NA	NA	NA	NA	NA	NA	-0.158874	0.0208392	0.143788	0.0559874	-0.154151	0.0251247	0	0.0488209	-0.334356	0.0301803	NA	NA	NA	NA	NA	NA	NA	NA	NA	NA
18	18	6	Degradation leads to dramatic decrease in topsoil but _x000D_ not subsoil root biomass in an alpine meadow on the _x000D_ Tibetan Plateau, Chi	101.5	32.3333	HD	meadow	0-10	-0.85105	0.011903	NA	NA	NA	NA	NA	NA	0.0300775	0.00554393	NA	NA	NA	-0.49906	0.106175	NA	NA	NA	NA	NA	NA	-0.532907	0.020524	-0.0973742	0.0271586	-0.154151	0.0251247	-0.0931601	0.0606198	-0.0700076	0.06878	NA	NA	NA	NA	NA	NA	NA	NA	NA	NA
19	19	6	Degradation leads to dramatic decrease in topsoil but _x000D_ not subsoil root biomass in an alpine meadow on the _x000D_ Tibetan Plateau, Chi	101.5	32.3333	ED	meadow	0-10	-1.65542	0.0101893	NA	NA	NA	NA	NA	NA	0.0076046	0.0141042	NA	NA	NA	-0.806429	0.0980127	NA	NA	NA	NA	NA	NA	-1.36042	0.0695753	-0.74607	0.0283926	-0.297252	0.0443292	-1.40903	0.0471808	0.190849	0.0344096	NA	NA	NA	NA	NA	NA	NA	NA	NA	NA
20	20	7	Degradation stage effects on vegetation and soil properties interactions in _x000D_ alpine steppe	96.8333	33.8333	LD	steppe	0-10	NA	NA	0.0882624	0.00650095	0.112619	0.0168807	0.179693	0.0291177	0.0759859	0.0194643	NA	NA	NA	NA	NA	NA	NA	NA	NA	NA	NA	-0.0939318	0.0171743	-0.0806889	0.00262776	NA	NA	NA	NA	NA	NA	NA	NA	NA	NA	0.0481124	0.00792128	0.0271019	0.00394182	NA	NA
21	21	7	Degradation stage effects on vegetation and soil properties interactions in _x000D_ alpine steppe	96.8333	33.8333	MD	steppe	0-10	NA	NA	-0.0506159	0.00848952	-0.145907	0.0268223	0.132547	0.0301577	0.146603	0.0117968	NA	NA	NA	NA	NA	NA	NA	NA	NA	NA	NA	-0.239658	0.0265013	-0.141314	0.0124399	NA	NA	NA	NA	NA	NA	NA	NA	NA	NA	-0.0792808	0.0105558	-0.211309	0.00631429	NA	NA
22	22	7	Degradation stage effects on vegetation and soil properties interactions in _x000D_ alpine steppe	96.8333	33.8333	HD	steppe	0-10	NA	NA	-0.447092	0.0132997	-0.775953	0.0261888	-0.219214	0.0289807	0.135175	0.00989566	NA	NA	NA	NA	NA	NA	NA	NA	NA	NA	NA	-0.682173	0.0253654	-0.670158	0.0255145	NA	NA	NA	NA	NA	NA	NA	NA	NA	NA	-0.362937	0.00806285	-0.670213	0.01975	NA	NA
23	23	7	Degradation stage effects on vegetation and soil properties interactions in _x000D_ alpine steppe	96.8333	33.8333	ED	steppe	0-10	NA	NA	-0.92383	0.0499062	-0.991928	0.0191197	-0.487478	0.0501582	0.264387	0.00953461	NA	NA	NA	NA	NA	NA	NA	NA	NA	NA	NA	-0.953169	0.0299165	-0.947789	0.0775211	NA	NA	NA	NA	NA	NA	NA	NA	NA	NA	-0.385095	0.0208414	-0.725408	0.0257494	NA	NA
24	24	8	Effect of degradation and rebuilding of artificial grasslands on soil_x000D_ respiration and carbon and nitrogen pools on an alpine meadow of the_x000D_ Qinghai-Tibetan Plateau	102.767	37.1833	LD	meadow	0-10	-0.0584769	2.52091e-05	-0.271793	0.00120155	-0.221446	0.00135566	0.0668629	8.48672e-05	NA	NA	NA	NA	NA	-0.144523	0.00333333	NA	NA	NA	NA	NA	NA	NA	NA	NA	NA	NA	NA	NA	NA	NA	NA	NA	NA	NA	NA	NA	NA	NA	NA	NA	NA
25	25	8	Effect of degradation and rebuilding of artificial grasslands on soil_x000D_ respiration and carbon and nitrogen pools on an alpine meadow of the_x000D_ Qinghai-Tibetan Plateau	102.767	37.1833	MD	meadow	0-10	-0.338695	0.000182751	-1.64019	0.0027182	-0.260324	0.00179304	-0.0490562	2.40639e-05	NA	NA	NA	NA	NA	-0.306324	0.00333333	NA	NA	NA	NA	NA	NA	NA	NA	NA	NA	NA	NA	NA	NA	NA	NA	NA	NA	NA	NA	NA	NA	NA	NA	NA	NA
26	26	8	Effect of degradation and rebuilding of artificial grasslands on soil_x000D_ respiration and carbon and nitrogen pools on an alpine meadow of the_x000D_ Qinghai-Tibetan Plateau	102.767	37.1833	HD	meadow	0-10	-1.07265	0.000392427	-2.38117	0.00172255	-1.86222	0.000956272	-0.106543	5.84716	NA	NA	NA	NA	NA	-0.342825	0.00333333	NA	NA	NA	NA	NA	NA	NA	NA	NA	NA	NA	NA	NA	NA	NA	NA	NA	NA	NA	NA	NA	NA	NA	NA	NA	NA
27	27	9	Influence of degradation on soil water availability in an alpine swamp_x000D_ meadow on the eastern edge of the Tibetan Plateau	102	34	MD	meadow	0-10	NA	NA	NA	NA	NA	NA	NA	NA	0.166127	0.00159914	NA	NA	NA	-0.280302	0.00809126	NA	NA	NA	NA	NA	NA	-0.254423	0.00804652	NA	NA	NA	NA	NA	NA	NA	NA	NA	NA	NA	NA	NA	NA	NA	NA	NA	NA
28	28	9	Influence of degradation on soil water availability in an alpine swamp_x000D_ meadow on the eastern edge of the Tibetan Plateau	102	34	ED	meadow	0-10	NA	NA	NA	NA	NA	NA	NA	NA	0.272507	0.00118187	NA	NA	NA	-0.577836	0.00968136	NA	NA	NA	NA	NA	NA	-1.3749	0.0428007	NA	NA	NA	NA	NA	NA	NA	NA	NA	NA	NA	NA	NA	NA	NA	NA	NA	NA
29	29	10	Land Degradation Enriches Soil d13C in Alpine Steppe _x000D_ and Soil d15N in Alpine Desert by Changing Plant and _x000D_ Soil Features on Qinghai-Tibetan Plateau	101.317	37.6167	LD	meadow	0-5	NA	NA	NA	NA	NA	NA	NA	NA	0.277211	0.014295	0.0538592	0.000148251	0.42	NA	NA	NA	NA	NA	NA	NA	NA	-0.480034	0.00137998	-0.193191	0.0007996	NA	NA	NA	NA	NA	NA	NA	NA	NA	NA	NA	NA	NA	NA	NA	NA
30	30	11	One-year grazing exclusion remarkably restores degraded_x000D_ alpine meadow at Zoige, eastern Tibetan Plateau	102.6	33.2167	LD	meadow	0-30	-0.131928	0.00666667	0.156005	0.0619445	0.579878	0.128503	0.331963	0.04523	-0.0562397	0.00310504	NA	NA	NA	0.0497476	0.0455386	NA	NA	NA	NA	NA	NA	-0.116084	0.0113113	0.134819	0.0921707	0	0.0183655	0.0496968	0.0011421	-0.0791373	0.104931	NA	NA	NA	NA	NA	NA	NA	NA	NA	NA
31	31	11	One-year grazing exclusion remarkably restores degraded_x000D_ alpine meadow at Zoige, eastern Tibetan Plateau	102.6	33.2167	MD	meadow	0-30	-0.283944	0.00666667	-0.158447	0.0512514	0.00394583	0.122482	0.459118	0.0561137	0.0155042	0.00362034	NA	NA	NA	-0.134353	0.0210146	NA	NA	NA	NA	NA	NA	-0.328504	0.0139111	0.143788	0.0590695	-0.0953102	0.00811754	-0.0971929	0.000141688	-0.324587	0.101756	NA	NA	NA	NA	NA	NA	NA	NA	NA	NA
32	32	11	One-year grazing exclusion remarkably restores degraded_x000D_ alpine meadow at Zoige, eastern Tibetan Plateau	102.6	33.2167	HD	meadow	0-30	-0.85105	0.00666667	-0.127917	0.0782039	-0.802423	0.0772451	-0.107989	0.0648965	0.0679507	0.00308649	NA	NA	NA	-0.287682	0.0149679	NA	NA	NA	NA	NA	NA	-0.72237	0.0146101	-0.257223	0.0454244	-0.200671	0.00504484	-0.251212	0.000351977	-0.370749	0.0873034	NA	NA	NA	NA	NA	NA	NA	NA	NA	NA
33	33	11	One-year grazing exclusion remarkably restores degraded_x000D_ alpine meadow at Zoige, eastern Tibetan Plateau	102.6	33.2167	ED	meadow	0-30	-1.65542	0.0133333	-0.537552	0.118194	-1.12805	0.0752866	0.553976	0.0486583	0.0752234	0.00276816	NA	NA	NA	-0.476924	0.0156462	NA	NA	NA	NA	NA	NA	-1.56255	0.0178212	-0.74607	0.035728	-0.200671	0.00504484	-1.31464	0.00455695	-0.142892	0.0949954	NA	NA	NA	NA	NA	NA	NA	NA	NA	NA
34	34	12	Pasture degradation impact on soil carbon and nitrogen fractions_x000D_ of alpine meadow in a Tibetan permafrost region	92.5833	34.6	LD	meadow	0-20	NA	NA	NA	NA	NA	NA	NA	NA	0.0383189	0.00282846	0.0578196	0.00021557	0.5	NA	NA	0.0463762	0.0050791	-0.0987348	0.0172681	0.162519	0.0392878	-0.348307	0.00409813	-0.351398	0.0151246	NA	NA	NA	NA	NA	NA	NA	NA	NA	NA	NA	NA	NA	NA	NA	NA
35	35	12	Pasture degradation impact on soil carbon and nitrogen fractions_x000D_ of alpine meadow in a Tibetan permafrost region	92.5833	34.6	HD	meadow	0-20	NA	NA	NA	NA	NA	NA	NA	NA	0.110814	0.00262244	0.0800427	0.000208252	0.7	NA	NA	-0.0927817	0.00389181	0.125666	0.00854003	0.424883	0.0426162	-0.479041	0.0101616	-0.587787	0.0247645	NA	NA	NA	NA	NA	NA	NA	NA	NA	NA	NA	NA	NA	NA	NA	NA
36	36	13	Physicochemical properties and micromorphology of degraded alpine_x000D_ meadow soils in the Eastern Qinghai-Tibet Plateau	101.633	33.5	LD	meadow	0-10	NA	NA	NA	NA	NA	NA	NA	NA	NA	NA	0.0588405	0.00666667	0.38	-1.50024	0.00666667	0.113944	0.00666667	-0.105361	0.00666667	-0.200671	0.00666667	0.146668	0.00666667	0.188401	0.00666667	NA	NA	NA	NA	NA	NA	NA	NA	-0.0414309	0.00666667	NA	NA	NA	NA	NA	NA
37	37	13	Physicochemical properties and micromorphology of degraded alpine_x000D_ meadow soils in the Eastern Qinghai-Tibet Plateau	101.633	33.5	ED	meadow	0-10	NA	NA	NA	NA	NA	NA	NA	NA	NA	NA	0.102965	0.00666667	0.68	-2.46964	0.00666667	0.321584	0.00666667	-0.798508	0.00666667	-0.693147	0.00666667	-1.01054	0.00666667	-0.843241	0.00666667	NA	NA	NA	NA	NA	NA	NA	NA	-0.168457	0.00666667	NA	NA	NA	NA	NA	NA
38	38	14	Plant community changes determine the vegetation and soil_x000D_ δ13C and δ15N enrichment in degraded alpine grassland	90.6	29.6833	LD	meadow	0-10	NA	NA	NA	NA	NA	NA	NA	NA	NA	NA	0.076961	0.00220966	0.6	-0.319319	0.034249	NA	NA	NA	NA	NA	NA	-0.476273	0.0289967	-0.476924	0.0237417	NA	NA	NA	NA	NA	NA	NA	NA	0	0.000873547	-0.416247	0.00770907	-0.379116	0.0179298	NA	NA
39	39	14	Plant community changes determine the vegetation and soil_x000D_ δ13C and δ15N enrichment in degraded alpine grassland	90.6	29.6833	MD	meadow	0-10	NA	NA	NA	NA	NA	NA	NA	NA	NA	NA	0.076961	0.00297174	0.6	-0.348307	0.0225154	NA	NA	NA	NA	NA	NA	-0.575364	0.027362	-0.527568	0.0205212	NA	NA	NA	NA	NA	NA	NA	NA	-0.0420334	0.000599742	-0.466257	0.00758792	-0.407895	0.0170329	NA	NA
40	40	14	Plant community changes determine the vegetation and soil_x000D_ δ13C and δ15N enrichment in degraded alpine grassland	90.6	29.6833	HD	meadow	0-10	NA	NA	NA	NA	NA	NA	NA	NA	NA	NA	0.125163	0.00381453	1	-0.591253	0.0185674	NA	NA	NA	NA	NA	NA	-1.16315	0.0207281	-0.989809	0.0181594	NA	NA	NA	NA	NA	NA	NA	NA	-0.165514	0.000687274	-0.779915	0.00515452	-0.574286	0.0123856	NA	NA
41	41	14	Plant community changes determine the vegetation and soil_x000D_ δ13C and δ15N enrichment in degraded alpine grassland	90.6	29.6833	ED	meadow	0-10	NA	NA	NA	NA	NA	NA	NA	NA	NA	NA	0.136859	0.00376333	1.1	-0.635989	0.0234525	NA	NA	NA	NA	NA	NA	-1.8563	0.0386969	-1.50408	0.0412685	NA	NA	NA	NA	NA	NA	NA	NA	-0.339868	0.000854167	-0.779915	0.00761681	-0.683485	0.0126389	NA	NA
42	42	15	Plant community of alpine steppe shows stronger association with soil properties than alpine meadow alongside degradation	99.337	35.7887	LD	meadow	0-10	NA	NA	NA	NA	NA	NA	-0.157349	0.182481	0.225162	0.00428963	0.0865254	0.00136598	0.632653	NA	NA	NA	NA	NA	NA	NA	NA	NA	NA	NA	NA	NA	NA	NA	NA	NA	NA	NA	NA	0.0258079	0.00586842	-0.454142	0.00707978	-0.29176	0.00874423	NA	NA
43	43	15	Plant community of alpine steppe shows stronger association with soil properties than alpine meadow alongside degradation	99.337	35.7887	MD	meadow	0-10	NA	NA	NA	NA	NA	NA	-0.296662	0.318522	0.287682	0.0026039	0.120694	0.00110294	0.897959	NA	NA	NA	NA	NA	NA	NA	NA	NA	NA	NA	NA	NA	NA	NA	NA	NA	NA	NA	NA	-0.0400053	0.00427299	-0.497838	0.00599858	-0.265365	0.00883534	NA	NA
44	44	15	Plant community of alpine steppe shows stronger association with soil properties than alpine meadow alongside degradation	99.337	35.7887	HD	meadow	0-10	NA	NA	NA	NA	NA	NA	-0.377135	0.191888	0.480054	0.00213525	0.175985	0.0010547	1.34694	NA	NA	NA	NA	NA	NA	NA	NA	NA	NA	NA	NA	NA	NA	NA	NA	NA	NA	NA	NA	-0.476561	0.00332984	-0.887303	0.0041671	-0.450876	0.0117462	NA	NA
45	45	15	Plant community of alpine steppe shows stronger association with soil properties than alpine meadow alongside degradation	99.337	35.7887	ED	meadow	0-10	NA	NA	NA	NA	NA	NA	-0.891692	0.590235	0.558172	0.0023793	0.151231	0.00123219	1.14286	NA	NA	NA	NA	NA	NA	NA	NA	NA	NA	NA	NA	NA	NA	NA	NA	NA	NA	NA	NA	-0.395709	0.00554847	-0.917045	0.00511216	-0.725863	0.0168236	NA	NA
46	46	16	Plant community of alpine steppe shows stronger association with soil properties than alpine meadow alongside degradation	99.337	35.7887	LD	steppe	0-10	NA	NA	NA	NA	NA	NA	-0.173738	0.136929	0.312375	0.00158257	0.0544689	0.000104208	0.44898	NA	NA	NA	NA	NA	NA	NA	NA	NA	NA	NA	NA	NA	NA	NA	NA	NA	NA	NA	NA	0.0920189	0.00055582	-0.339354	0.0102121	-0.0795121	0.012946	NA	NA
47	47	16	Plant community of alpine steppe shows stronger association with soil properties than alpine meadow alongside degradation	99.337	35.7887	MD	steppe	0-10	NA	NA	NA	NA	NA	NA	-0.153433	0.130094	0.255933	0.00125855	0.0544689	6.54986e-05	0.44898	NA	NA	NA	NA	NA	NA	NA	NA	NA	NA	NA	NA	NA	NA	NA	NA	NA	NA	NA	NA	0.0584962	0.000580942	-0.401874	0.00606998	-0.100419	0.00588018	NA	NA
48	48	16	Plant community of alpine steppe shows stronger association with soil properties than alpine meadow alongside degradation	99.337	35.7887	HD	steppe	0-10	NA	NA	NA	NA	NA	NA	-0.270588	0.277129	0.3658	0.0021825	0.0782796	8.06675e-05	0.653061	NA	NA	NA	NA	NA	NA	NA	NA	NA	NA	NA	NA	NA	NA	NA	NA	NA	NA	NA	NA	0.0238106	0.000931723	-0.662448	0.00406202	-0.324443	0.0149727	NA	NA
49	49	16	Plant community of alpine steppe shows stronger association with soil properties than alpine meadow alongside degradation	99.337	35.7887	ED	steppe	0-10	NA	NA	NA	NA	NA	NA	-0.851618	0.321811	0.388658	0.00125965	0.0992349	6.28465e-05	0.836735	NA	NA	NA	NA	NA	NA	NA	NA	NA	NA	NA	NA	NA	NA	NA	NA	NA	NA	NA	NA	0.0119762	0.000618715	-0.507633	0.00763388	-0.529037	0.0172489	NA	NA
50	50	17	Response of the plant community and soil water status to alpine Kobresia meadow degradation gradients on the Qinghai–Tibetan Plateau, Chi	101.317	37.6167	LD	meadow	0-10	-0.0776886	0.000907698	-0.68983	0.0301199	0.149321	0.03571	-0.297252	0.00516657	-0.0709517	0.0111413	NA	NA	NA	-0.155523	0.0174968	NA	NA	NA	NA	NA	NA	0.163346	0.0111214	NA	NA	NA	NA	NA	NA	NA	NA	NA	NA	NA	NA	NA	NA	NA	NA	NA	NA
51	51	17	Response of the plant community and soil water status to alpine Kobresia meadow degradation gradients on the Qinghai–Tibetan Plateau, Chi	101.317	37.6167	MD	meadow	0-10	-0.405465	0.00153683	-1.18433	0.00337046	0.931347	0.0419329	-0.0896122	0.00357686	-0.131576	0.0113922	NA	NA	NA	-0.897942	0.0123626	NA	NA	NA	NA	NA	NA	0.70659	0.0129885	NA	NA	NA	NA	NA	NA	NA	NA	NA	NA	NA	NA	NA	NA	NA	NA	NA	NA
52	52	18	Response of vegetation and soils to desertification of alpine_x000D_ meadow in the upper basin of the Yellow River, Chi	106.767	33.1	LD	meadow	0-20	-0.199702	0.00536995	NA	NA	NA	NA	-0.330242	0.00666667	0.0623039	0.000332166	NA	NA	NA	-0.840057	0.109942	0.0879952	0.000568223	-0.521441	0.00790788	0.0553136	0.0180472	-1.21091	0.0143458	-2.18926	0.0743815	-0.440733	0.000646099	NA	NA	NA	NA	NA	NA	NA	NA	NA	NA	NA	NA	NA	NA
53	53	18	Response of vegetation and soils to desertification of alpine_x000D_ meadow in the upper basin of the Yellow River, Chi	106.767	33.1	MD	meadow	0-20	-0.70964	0.0102763	NA	NA	NA	NA	-0.529427	0.00666667	0.0887955	0.000400265	NA	NA	NA	-1.07335	0.0888251	0.125045	0.000591737	-0.751045	0.00956732	-0.581174	0.0281257	-1.57381	0.0384388	-2.31601	0.085055	-0.492027	0.000659416	NA	NA	NA	NA	NA	NA	NA	NA	NA	NA	NA	NA	NA	NA
54	54	18	Response of vegetation and soils to desertification of alpine_x000D_ meadow in the upper basin of the Yellow River, Chi	106.767	33.1	ED	meadow	0-20	-1.31985	0.0127419	NA	NA	NA	NA	-0.87163	0.00666667	0.120953	0.00048575	NA	NA	NA	-1.28782	0.0745151	0.131676	0.000604898	-0.821775	0.0300493	-0.589684	0.0262792	-1.78145	0.0449662	-2.74887	0.0640357	-0.585314	0.000845458	NA	NA	NA	NA	NA	NA	NA	NA	NA	NA	NA	NA	NA	NA
55	55	19	Responses of plant productivity and soil nutrient concentrations to different alpine grassland degradation levels	92.9333	34.8167	LD	steppe	0-20	NA	NA	NA	NA	NA	NA	NA	NA	NA	NA	NA	NA	NA	NA	NA	NA	NA	NA	NA	NA	NA	-0.287682	0.000416093	-0.592051	0.00105694	-0.0673037	0.00016631	-0.330078	0.00067965	-0.433355	0.00368432	NA	NA	NA	NA	NA	NA	NA	NA	NA	NA
56	56	19	Responses of plant productivity and soil nutrient concentrations to different alpine grassland degradation levels	92.9333	34.8167	MD	steppe	0-20	NA	NA	NA	NA	NA	NA	NA	NA	NA	NA	NA	NA	NA	NA	NA	NA	NA	NA	NA	NA	NA	-0.369747	0.000494297	-0.959776	0.000757491	-0.197826	0.000264641	-0.579145	0.000508769	-0.424306	0.00278212	NA	NA	NA	NA	NA	NA	NA	NA	NA	NA
57	57	20	Responses of soil insect communities to alpine wetland degradation on the _x000D_ eastern Qinghai-Tibetan Plateau, Chi	102.133	32.9333	ED	meadow	0-15	-2.73361	0.00157775	-0.918653	0.00458112	-2.40202	0.00950498	-2.67845	0.0741842	0.390866	0.000501616	0.351958	3.83658e-05	2.51	-1.91047	0.00252753	NA	NA	NA	NA	NA	NA	-2.762	0.00283047	NA	NA	NA	NA	-1.46266	0.00104024	-0.860587	0.00098459	-2.3437	0.00514683	NA	NA	NA	NA	NA	NA	NA	NA
58	58	21	Responses of soil organic carbon and nutrient stocks to human-induced_x000D_ grassland degradation in a Tibetan alpine meadow	92.5833	34.6	LD	meadow	0-20	-0.182322	0.00293748	-0.333895	0.0038896	NA	NA	0.290396	0.0119647	0.0810412	0.0014979	0.0635134	0.000149723	0.549618	-0.382324	0.0133027	0.0441057	0.00248786	-0.0426994	0.00871864	0.124454	0.020069	-0.370722	0.0027553	-0.367725	0.00477247	0.0176996	0.000496468	NA	NA	-0.142449	0.0081606	NA	NA	-0.00930239	0.00254782	NA	NA	NA	NA	-0.215596	0.014027
59	59	21	Responses of soil organic carbon and nutrient stocks to human-induced_x000D_ grassland degradation in a Tibetan alpine meadow	92.5833	34.6	HD	meadow	0-20	-0.693147	0.00712593	-0.774727	0.00770265	NA	NA	0.223144	0.00999449	0.161544	0.0014476	0.0762524	0.00014749	0.664122	-0.670006	0.021903	-0.0945147	0.00204625	0.151851	0.00445747	0.405465	0.0189493	-0.540441	0.00900591	-0.639658	0.00901141	0.0293276	0.000699514	NA	NA	-0.165514	0.0112599	NA	NA	0.105361	0.00325964	NA	NA	NA	NA	-0.314296	0.0124362
60	60	22	Restoration efficiency of short-term grazing exclusion is the highest at the_x000D_ stage shifting from light to moderate degradation at Zoige, Tibetan Plateau	102.6	33.2167	LD	meadow	0-10	NA	NA	NA	NA	NA	NA	NA	NA	0.655916	0.00666667	0.186511	0.00666667	1	0.0472444	0.00666667	NA	NA	NA	NA	NA	NA	0.354257	0.00666667	1.64705	0.00666667	1.13322	0.00666667	0.00241089	0.00666667	0.076074	0.00666667	NA	NA	NA	NA	NA	NA	NA	NA	NA	NA
61	61	22	Restoration efficiency of short-term grazing exclusion is the highest at the_x000D_ stage shifting from light to moderate degradation at Zoige, Tibetan Plateau	102.6	33.2167	MD	meadow	0-10	NA	NA	NA	NA	NA	NA	NA	NA	1.04866	0.00666667	0.343644	0.00666667	2	0.0923572	0.00666667	NA	NA	NA	NA	NA	NA	0.615316	0.00666667	2.23892	0.00666667	1.65083	0.00666667	0.00481597	0.00666667	0.146768	0.00666667	NA	NA	NA	NA	NA	NA	NA	NA	NA	NA
62	62	22	Restoration efficiency of short-term grazing exclusion is the highest at the_x000D_ stage shifting from light to moderate degradation at Zoige, Tibetan Plateau	102.6	33.2167	HD	meadow	0-10	NA	NA	NA	NA	NA	NA	NA	NA	1.32991	0.00666667	0.479406	0.00666667	3	0.135522	0.00666667	NA	NA	NA	NA	NA	NA	0.822139	0.00666667	2.60822	0.00666667	1.99019	0.00666667	0.00721529	0.00666667	0.212792	0.00666667	NA	NA	NA	NA	NA	NA	NA	NA	NA	NA
63	63	22	Restoration efficiency of short-term grazing exclusion is the highest at the_x000D_ stage shifting from light to moderate degradation at Zoige, Tibetan Plateau	102.6	33.2167	ED	meadow	0-10	NA	NA	NA	NA	NA	NA	NA	NA	1.54918	0.00666667	0.59892	0.00666667	4	0.176901	0.00666667	NA	NA	NA	NA	NA	NA	0.993431	0.00666667	2.87731	0.00666667	2.24311	0.00666667	0.00960886	0.00666667	0.274726	0.00666667	NA	NA	NA	NA	NA	NA	NA	NA	NA	NA
64	64	23	Root Features Determine the Increasing Proportion of Forbs in Response to Degradation in Alpine Steppe, Tibetan Plateau	88.7	30.95	LD	steppe	0-10	-0.189305	0.00666667	NA	NA	NA	NA	NA	NA	NA	NA	NA	NA	NA	-0.0846831	0.012941	NA	NA	NA	NA	NA	NA	NA	NA	-0.496234	0.158438	0.154151	0.0327538	0.345019	0.0476804	-0.0305367	1.82773	NA	NA	NA	NA	NA	NA	NA	NA	NA	NA
65	65	23	Root Features Determine the Increasing Proportion of Forbs in Response to Degradation in Alpine Steppe, Tibetan Plateau	88.7	30.95	MD	steppe	0-10	-0.372103	0.00666667	NA	NA	NA	NA	NA	NA	NA	NA	NA	NA	NA	-0.187463	0.213869	NA	NA	NA	NA	NA	NA	NA	NA	-0.484619	0.153444	0.105361	0.0748457	0.0960902	0.0452388	0.447189	0.626375	NA	NA	NA	NA	NA	NA	NA	NA	NA	NA
66	66	23	Root Features Determine the Increasing Proportion of Forbs in Response to Degradation in Alpine Steppe, Tibetan Plateau	88.7	30.95	HD	steppe	0-10	-0.797452	0.00666495	NA	NA	NA	NA	NA	NA	NA	NA	NA	NA	NA	-0.355455	0.0352885	NA	NA	NA	NA	NA	NA	NA	NA	-0.691726	0.17943	0.200671	0.0454035	-0.16151	0.0353414	0.619039	0.526314	NA	NA	NA	NA	NA	NA	NA	NA	NA	NA
67	67	23	Root Features Determine the Increasing Proportion of Forbs in Response to Degradation in Alpine Steppe, Tibetan Plateau	88.7	30.95	ED	steppe	0-10	-1.80507	NA	NA	NA	NA	NA	NA	NA	NA	NA	NA	NA	NA	-0.608513	0.00645883	NA	NA	NA	NA	NA	NA	NA	NA	-0.612558	0.197473	0.154151	0.0939783	-0.0260884	0.236217	0.137908	0.589514	NA	NA	NA	NA	NA	NA	NA	NA	NA	NA
68	68	24	Soil extractable organic C and N contents, methanotrophic activity under_x000D_ warming and degradation in a Tibetan alpine meadow	92.1	31.2833	LD	meadow	0-10	-0.121697	0.000165535	-0.0154343	0.00242696	-0.0478074	5.91011e-05	0.657215	0.000370785	NA	NA	NA	NA	NA	-0.467213	0.00302885	NA	NA	NA	NA	NA	NA	NA	NA	-0.452289	0.0081005	NA	NA	NA	NA	NA	NA	NA	NA	-0.0195128	0.000933058	-0.205775	0.028648	0.539413	0.108375	NA	NA
69	69	24	Soil extractable organic C and N contents, methanotrophic activity under_x000D_ warming and degradation in a Tibetan alpine meadow	92.1	31.2833	HD	meadow	0-10	-0.613104	0.0133407	-0.58163	0.00975813	-1.55917	0.00193183	-0.331777	0.000743084	NA	NA	NA	NA	NA	-0.841328	0.00263252	NA	NA	NA	NA	NA	NA	NA	NA	-1.02283	0.00454628	NA	NA	NA	NA	NA	NA	NA	NA	-0.0275022	0.000296703	-1.17127	0.0283831	-0.133531	0.122073	NA	NA
70	70	25	Soil water retention in alpine meadows under different degradation stages on the northeastern Qinghai-Tibet Plateau	101.317	37.6167	LD	meadow	0-10	NA	NA	-0.317853	0.057811	0.0548584	0.0100648	NA	NA	-0.168419	0.00888751	NA	NA	NA	NA	NA	0.0721219	0.00601723	-0.117322	0.0177968	-0.21441	0.045392	0.313129	0.0739973	NA	NA	0.0515452	0.0692002	NA	NA	NA	NA	NA	NA	NA	NA	NA	NA	NA	NA	NA	NA
71	71	25	Soil water retention in alpine meadows under different degradation stages on the northeastern Qinghai-Tibet Plateau	101.317	37.6167	MD	meadow	0-10	NA	NA	-0.431155	0.0461713	0.709923	0.00823679	NA	NA	-0.18633	0.00815797	NA	NA	NA	NA	NA	0.101507	0.00126756	-0.172773	0.00385934	-0.297476	0.00519916	0.415722	0.0439235	NA	NA	0.0174786	0.0252921	NA	NA	NA	NA	NA	NA	NA	NA	NA	NA	NA	NA	NA	NA
72	72	26	The effect of desertification on carbon and nitrogen status_x000D_ in the northeastern margin of the Qinghai-Tibetan Plateau	106.767	33.1	LD	meadow	0-20	-0.157724	0.00657207	NA	NA	NA	NA	NA	NA	NA	NA	NA	NA	NA	NA	NA	NA	NA	NA	NA	NA	NA	-0.562765	0.00284952	NA	NA	NA	NA	NA	NA	NA	NA	NA	NA	0.264851	0.0138624	NA	NA	NA	NA	NA	NA
73	73	26	The effect of desertification on carbon and nitrogen status_x000D_ in the northeastern margin of the Qinghai-Tibetan Plateau	106.767	33.1	HD	meadow	0-20	-0.631778	0.00555897	NA	NA	NA	NA	NA	NA	NA	NA	NA	NA	NA	NA	NA	NA	NA	NA	NA	NA	NA	-1.39156	0.00316278	NA	NA	NA	NA	NA	NA	NA	NA	NA	NA	0.346793	0.0125032	NA	NA	NA	NA	NA	NA
74	74	26	The effect of desertification on carbon and nitrogen status_x000D_ in the northeastern margin of the Qinghai-Tibetan Plateau	106.767	33.1	ED	meadow	0-20	-1.20782	0.00579652	NA	NA	NA	NA	NA	NA	NA	NA	NA	NA	NA	NA	NA	NA	NA	NA	NA	NA	NA	-2.34241	0.00625601	NA	NA	NA	NA	NA	NA	NA	NA	NA	NA	0.458233	0.00648365	NA	NA	NA	NA	NA	NA
75	75	27	The variation in soil water retention of alpine shrub meadow under different degrees of degradation on northeastern Qinghai-Tibetan plateau	101.317	37.6167	LD	meadow	0-10	NA	NA	-0.165551	0.00570092	0.163757	0.0135386	NA	NA	-0.08029	0.00445951	NA	NA	NA	NA	NA	0.583948	0.0230751	-0.296899	0.00232334	-0.262129	0.00521191	0.103635	0.0183769	NA	NA	-0.022757	0.020892	0.103635	0.0183769	0.334486	0.00288524	NA	NA	NA	NA	NA	NA	NA	NA	NA	NA
76	76	27	The variation in soil water retention of alpine shrub meadow under different degrees of degradation on northeastern Qinghai-Tibetan plateau	101.317	37.6167	ED	meadow	0-10	NA	NA	-0.615369	0.0111008	-0.827966	0.00936934	NA	NA	-0.412911	0.00120297	NA	NA	NA	NA	NA	0.795486	0.0260736	-0.486655	0.00633877	-0.635989	0.0157188	0.98513	0.0147241	NA	NA	0.146263	0.0178276	0.98513	0.0147241	0.275103	0.00461836	NA	NA	NA	NA	NA	NA	NA	NA	NA	NA
77	77	28	Variations in soil δ13C with alpine meadow degradation on the eastern_x000D_ Qinghai–Tibet Plateau	102.133	32.35	LD	meadow	0-10	-0.184715	7.18388e-05	-0.396319	0.00458594	-0.276144	0.00274672	-0.158224	0.00572478	0.223144	0.00287319	0.0111112	0.000143275	0.08	-0.556023	0.00214826	0.643379	0.00697001	-0.460495	0.00122987	0.480668	0.00495959	0.219859	0.00948871	-0.736975	0.0140892	-0.0277796	0.0145725	NA	NA	NA	NA	NA	NA	0.0309809	0.00355233	NA	NA	NA	NA	NA	NA
78	78	28	Variations in soil δ13C with alpine meadow degradation on the eastern_x000D_ Qinghai–Tibet Plateau	102.133	32.35	MD	meadow	0-10	-0.439401	8.76623e-05	-0.684374	0.00207602	-0.479904	0.00184305	-0.435673	0.00733826	0.36685	0.00179908	0.0932766	0.000199175	0.7	-0.425635	0.00232571	0.917854	0.00555952	-0.553099	0.00158215	-0.429818	0.00513006	0.693147	0.015604	-0.854758	0.0195708	-0.131576	0.0242884	NA	NA	NA	NA	NA	NA	-0.186783	0.00305049	NA	NA	NA	NA	NA	NA
79	79	29	Vegetation degradation impacts _x000D_ soil nutrients and enzyme _x000D_ activities in wet meadow _x000D_ on the Qinghai<U+2011>Tibet Plateau	102.083	33.97	LD	meadow	0-10	-0.110001	0.00666667	NA	NA	NA	NA	NA	NA	NA	NA	NA	NA	NA	NA	NA	NA	NA	NA	NA	NA	NA	-0.310325	6.21663e-05	-0.0648781	7.56569e-05	-0.105361	0.00114143	NA	NA	NA	NA	NA	NA	NA	NA	NA	NA	NA	NA	NA	NA
80	80	29	Vegetation degradation impacts _x000D_ soil nutrients and enzyme _x000D_ activities in wet meadow _x000D_ on the Qinghai<U+2011>Tibet Plateau	102.083	33.97	HD	meadow	0-10	-0.757686	0.00666667	NA	NA	NA	NA	NA	NA	NA	NA	NA	NA	NA	NA	NA	NA	NA	NA	NA	NA	NA	-0.631645	0.00450014	-0.266959	0.00053776	-0.140147	0.000492189	NA	NA	NA	NA	NA	NA	NA	NA	NA	NA	NA	NA	NA	NA
81	81	30	不同草地类型对三江源区草地土壤养分的影响	96.4056	34.2192	ED	meadow	0-10	NA	NA	NA	NA	NA	NA	NA	NA	NA	NA	NA	NA	NA	NA	NA	NA	NA	NA	NA	NA	NA	NA	NA	-0.741937	0.00408919	-0.109771	1.83438e-05	-1.437	1.58622e-05	-0.0444518	0.00210648	-0.557142	4.58162e-07	NA	NA	NA	NA	NA	NA	NA	NA
82	82	31	不同退化程度高寒草甸土壤理化性质及酶活性分析	100.218	34.4658	LD	meadow	0-10	NA	NA	NA	NA	NA	NA	NA	NA	NA	NA	0.0324855	0.000224533	0.21	-0.065236	0.000211576	NA	NA	NA	NA	NA	NA	-0.0804819	0.00194072	-0.0355851	0.000999256	0.0519597	0.00233801	NA	NA	0.223144	0.025625	0.279759	0.00169903	NA	NA	0.146603	0.0142643	-0.245122	0.0436111	NA	NA
83	83	31	不同退化程度高寒草甸土壤理化性质及酶活性分析	100.218	34.4658	MD	meadow	0-10	NA	NA	NA	NA	NA	NA	NA	NA	NA	NA	0.167538	0.00011492	1.16	-0.765277	0.00126971	NA	NA	NA	NA	NA	NA	-1.05951	0.00237939	-1.19857	0.000946834	-0.292136	0.0022575	NA	NA	-1.38629	0.038125	-0.126905	0.000776017	NA	NA	0.191055	0.0126802	1.0928	0.0110285	NA	NA
84	84	31	不同退化程度高寒草甸土壤理化性质及酶活性分析	100.218	34.4658	HD	meadow	0-10	NA	NA	NA	NA	NA	NA	NA	NA	NA	NA	0.14331	2.28758e-05	0.98	-0.837425	0.000732818	NA	NA	NA	NA	NA	NA	-1.02538	0.00191678	-0.900161	0.00101086	0.076961	0.00233019	NA	NA	-0.693147	0.018125	0.172298	0.000947369	NA	NA	0.888541	0.0116737	0.788457	0.0122497	NA	NA
85	85	31	不同退化程度高寒草甸土壤理化性质及酶活性分析	100.218	34.4658	ED	meadow	0-10	NA	NA	NA	NA	NA	NA	NA	NA	NA	NA	0.144672	2.70206e-05	0.99	-0.72877	0.00076035	NA	NA	NA	NA	NA	NA	-1.05746	0.00475542	-0.841892	0.00617783	0.076961	0.00252071	NA	NA	-0.693147	0.078125	0.332327	0.000987241	NA	NA	0.655609	0.0111325	1.00446	0.0118485	NA	NA
86	86	32	称多县清水河乡典型退化草地调查研究	97.1453	33.8073	LD	meadow	0-10	NA	NA	NA	NA	NA	NA	0.15621	0.005	NA	NA	NA	NA	NA	NA	NA	NA	NA	NA	NA	NA	NA	NA	NA	-0.146328	0.005	-0.0173917	0.005	-0.020432	0.005	-0.182322	0.005	-0.186756	0.005	NA	NA	NA	NA	NA	NA	NA	NA
87	87	32	称多县清水河乡典型退化草地调查研究	97.1453	33.8073	HD	meadow	0-10	NA	NA	NA	NA	NA	NA	0.0431632	0.005	NA	NA	NA	NA	NA	NA	NA	NA	NA	NA	NA	NA	NA	NA	NA	-0.263543	0.005	-0.109199	0.005	-0.0941872	0.005	-0.34484	0.005	-0.292858	0.005	NA	NA	NA	NA	NA	NA	NA	NA
88	88	32	称多县清水河乡典型退化草地调查研究	97.1453	33.8073	ED	meadow	0-10	NA	NA	NA	NA	NA	NA	-1.12587	0.005	NA	NA	NA	NA	NA	NA	NA	NA	NA	NA	NA	NA	NA	NA	NA	-1.29623	0.005	-0.168623	0.005	-0.20643	0.005	-0.405465	0.005	-0.484264	0.005	NA	NA	NA	NA	NA	NA	NA	NA
89	89	33	东祁连山不同退化程度高寒草甸_x000D_ 土壤养分特征研究	102.767	37.1833	LD	meadow	0-10	NA	NA	NA	NA	NA	NA	NA	NA	NA	NA	0.00769235	2.62997e-06	0.06	NA	NA	NA	NA	NA	NA	NA	NA	0.0353648	0.000141496	-0.18338	0.000162299	-0.250051	0.000624011	-0.178009	7.68067e-05	-0.204129	0.000191814	-2.80014	8.17517e-05	NA	NA	NA	NA	NA	NA	NA	NA
90	90	33	东祁连山不同退化程度高寒草甸_x000D_ 土壤养分特征研究	102.767	37.1833	MD	meadow	0-10	NA	NA	NA	NA	NA	NA	NA	NA	NA	NA	0.00641439	2.6333e-06	0.05	NA	NA	NA	NA	NA	NA	NA	NA	-0.101369	0.000139905	-0.200475	0.000201987	-0.568505	0.00117282	-0.112335	0.000248273	-0.234526	0.000156591	-2.83054	4.65291e-05	NA	NA	NA	NA	NA	NA	NA	NA
91	91	33	东祁连山不同退化程度高寒草甸_x000D_ 土壤养分特征研究	102.767	37.1833	ED	meadow	0-10	NA	NA	NA	NA	NA	NA	NA	NA	NA	NA	0.015326	4.21657e-06	0.12	NA	NA	NA	NA	NA	NA	NA	NA	-0.0347645	6.69639e-05	-0.673933	0.000434407	-0.738404	0.00046016	0.133353	0.000270639	0.237159	0.000204931	-2.35885	9.48688e-05	NA	NA	NA	NA	NA	NA	NA	NA
92	92	34	放牧季节及退化程度对高寒草甸_x000D_ 土壤有机碳的影	100.62	36.2804	LD	meadow	0-5	NA	NA	-0.564882	0.018147	0.128078	0.0190343	NA	NA	NA	NA	NA	NA	NA	NA	NA	NA	NA	NA	NA	NA	NA	-0.0547011	0.00323601	NA	NA	NA	NA	NA	NA	NA	NA	NA	NA	NA	NA	NA	NA	NA	NA	NA	NA
93	93	34	放牧季节及退化程度对高寒草甸_x000D_ 土壤有机碳的影	100.62	36.2804	MD	meadow	0-5	NA	NA	-0.656326	0.00726158	0.156745	0.0094489	NA	NA	NA	NA	NA	NA	NA	NA	NA	NA	NA	NA	NA	NA	NA	-0.108322	0.00282591	NA	NA	NA	NA	NA	NA	NA	NA	NA	NA	NA	NA	NA	NA	NA	NA	NA	NA
94	94	35	高寒草甸退化对祁连山土壤微生物生物量和氮矿化速_x000D_ 率的影响	102.736	37.195	LD	meadow	0-10	-0.149491	0.000457787	-0.101558	0.000469924	-0.774951	0.000764098	NA	NA	NA	NA	-0.0304592	7.92072e-05	-0.24	-0.170731	0.000486093	NA	NA	NA	NA	NA	NA	-0.121475	0.000130231	-0.16837	0.000163104	NA	NA	NA	NA	NA	NA	NA	NA	NA	NA	NA	NA	NA	NA	-0.108289	0.000473643
95	95	35	高寒草甸退化对祁连山土壤微生物生物量和氮矿化速_x000D_ 率的影响	102.736	37.195	MD	meadow	0-10	-0.389961	0.000990824	-0.495807	0.000436408	-0.328392	0.000325654	NA	NA	NA	NA	-0.0725707	6.71381e-05	-0.56	-0.44481	0.000481024	NA	NA	NA	NA	NA	NA	-0.251788	0.000298794	-0.423183	0.000685728	NA	NA	NA	NA	NA	NA	NA	NA	NA	NA	NA	NA	NA	NA	-0.249812	0.000221221
96	96	35	高寒草甸退化对祁连山土壤微生物生物量和氮矿化速_x000D_ 率的影响	102.736	37.195	HD	meadow	0-10	-0.944551	0.00181	-1.40151	0.00184683	-1.77378	0.00946401	NA	NA	NA	NA	-0.134961	9.57454e-05	-1.01	-1.04173	0.000517876	NA	NA	NA	NA	NA	NA	-0.409282	0.000249252	-0.633009	0.00167072	NA	NA	NA	NA	NA	NA	NA	NA	NA	NA	NA	NA	NA	NA	-0.719815	0.00448209
97	97	36	高寒草甸植物群落退化与土壤环境特征的关系研究	101.616	34.7342	LD	steppe	0-10	-0.040151	3.83181e-05	-0.60929	8.65203e-05	NA	NA	-0.012739	0.0479635	NA	NA	0.00836825	0.00104467	0.06	NA	NA	NA	NA	NA	NA	NA	NA	-0.260163	0.00421779	-0.354434	0.0150549	NA	NA	NA	NA	NA	NA	NA	NA	NA	NA	NA	NA	NA	NA	NA	NA
98	98	36	高寒草甸植物群落退化与土壤环境特征的关系研究	101.616	34.7342	ED	steppe	0-10	-1.05531	0.000104928	-2.44426	0.00137049	NA	NA	-0.135341	0.0664339	NA	NA	0.0451822	0.00354571	0.33	NA	NA	NA	NA	NA	NA	NA	NA	-0.782016	0.00578563	-0.848608	0.0142185	NA	NA	NA	NA	NA	NA	NA	NA	NA	NA	NA	NA	NA	NA	NA	NA
99	99	37	黄河源区高寒草甸不同退化阶段草地特征研究	95.7972	34.1264	ED	meadow	0-10	NA	NA	-0.383843	0.005	NA	NA	-0.241124	0.005	NA	NA	NA	NA	NA	NA	NA	NA	NA	NA	NA	NA	NA	-1.10954	0.005	-1.72668	0.005	0.0870114	0.005	0.155293	0.005	-0.125163	0.005	-0.058908	0.005	NA	NA	NA	NA	NA	NA	NA	NA
100	100	38	恢复生态学在“黑土型”退化草地植被_x000D_ 改建中的应用	99.797	33.6231	LD	meadow	0-10	NA	NA	NA	NA	NA	NA	NA	NA	NA	NA	-0.0235675	0.004	-0.15	NA	NA	NA	NA	NA	NA	NA	NA	NA	NA	0.882364	0.004	0.823869	0.00202	NA	NA	NA	NA	NA	NA	NA	NA	NA	NA	NA	NA	NA	NA
101	101	38	恢复生态学在“黑土型”退化草地植被_x000D_ 改建中的应用	99.797	33.6231	MD	meadow	0-10	NA	NA	NA	NA	NA	NA	NA	NA	NA	NA	-0.0125002	0.004	-0.08	NA	NA	NA	NA	NA	NA	NA	NA	NA	NA	1.07982	0.004	0.492961	0.004	NA	NA	NA	NA	NA	NA	NA	NA	NA	NA	NA	NA	NA	NA
102	102	38	恢复生态学在“黑土型”退化草地植被_x000D_ 改建中的应用	99.797	33.6231	ED	meadow	0-10	NA	NA	NA	NA	NA	NA	NA	NA	NA	NA	0.0365894	0.004	0.24	NA	NA	NA	NA	NA	NA	NA	NA	NA	NA	-0.325569	0.004	-0.0201518	0.004	NA	NA	NA	NA	NA	NA	NA	NA	NA	NA	NA	NA	NA	NA
103	103	39	江河源区不同退化程度高寒草地土壤物理、 化学及生物学特征研究	100.433	34.2833	LD	meadow	0-10	NA	NA	NA	NA	NA	NA	NA	NA	NA	NA	NA	NA	NA	NA	NA	NA	NA	NA	NA	NA	NA	-0.448025	0.00666667	0.0404236	0.00666667	0.0366493	0.00666667	-0.230839	0.00666667	0.250739	0.00666667	NA	NA	NA	NA	NA	NA	NA	NA	NA	NA
104	104	39	江河源区不同退化程度高寒草地土壤物理、 化学及生物学特征研究	100.433	34.2833	MD	meadow	0-10	NA	NA	NA	NA	NA	NA	NA	NA	NA	NA	NA	NA	NA	NA	NA	NA	NA	NA	NA	NA	NA	-1.09861	0.00666667	-0.446109	0.00666667	-0.0244823	0.00666667	-0.787776	0.00666667	-0.109399	0.00666667	NA	NA	NA	NA	NA	NA	NA	NA	NA	NA
105	105	39	江河源区不同退化程度高寒草地土壤物理、 化学及生物学特征研究	100.433	34.2833	HD	meadow	0-10	NA	NA	NA	NA	NA	NA	NA	NA	NA	NA	NA	NA	NA	NA	NA	NA	NA	NA	NA	NA	NA	-1.32773	0.00666667	-0.666479	0.00666667	0.0166844	0.00666667	-1.03269	0.00666667	-0.379888	0.00666667	NA	NA	NA	NA	NA	NA	NA	NA	NA	NA
106	106	40	拉脊山亚高寒草甸退化程度对_x000D_ 土壤养分影响的研究	101.434	36.04	LD	meadow	0-10	NA	NA	-0.237606	0.00666667	-0.339709	0.00666667	NA	NA	NA	NA	NA	NA	NA	NA	NA	NA	NA	NA	NA	NA	NA	NA	NA	-0.17185	0.00666667	-0.067502	0.00666667	NA	NA	NA	NA	NA	NA	NA	NA	NA	NA	NA	NA	NA	NA
107	107	40	拉脊山亚高寒草甸退化程度对_x000D_ 土壤养分影响的研究	101.434	36.04	ED	meadow	0-10	NA	NA	-1.33554	0.00666667	-0.993585	0.00666667	NA	NA	NA	NA	NA	NA	NA	NA	NA	NA	NA	NA	NA	NA	NA	NA	NA	-0.293547	0.00666667	-0.00523561	0.00666667	NA	NA	NA	NA	NA	NA	NA	NA	NA	NA	NA	NA	NA	NA
108	108	41	祁连山东部不同退化草地土壤细菌群落与_x000D_ 环境因子的关系研究	102.833	37.1743	LD	meadow	0-10	NA	NA	NA	NA	NA	NA	NA	NA	NA	NA	0.090202	0.00116825	0.64	NA	NA	NA	NA	NA	NA	NA	NA	-0.0954148	0.00185693	-0.0175443	0.00298136	-0.0103628	0.0021796	-0.176444	0.00685881	-0.224065	0.0150296	NA	NA	NA	NA	NA	NA	NA	NA	NA	NA
109	109	41	祁连山东部不同退化草地土壤细菌群落与_x000D_ 环境因子的关系研究	102.833	37.1743	HD	meadow	0-10	NA	NA	NA	NA	NA	NA	NA	NA	NA	NA	0.228439	0.00101224	1.74	NA	NA	NA	NA	NA	NA	NA	NA	-0.375074	0.00136538	-0.170221	0.00260842	-0.0103628	0.00185408	-0.560637	0.0143629	-0.267226	0.0210781	NA	NA	NA	NA	NA	NA	NA	NA	NA	NA
110	110	41	祁连山东部不同退化草地土壤细菌群落与_x000D_ 环境因子的关系研究	102.833	37.1743	ED	meadow	0-10	NA	NA	NA	NA	NA	NA	NA	NA	NA	NA	0.241267	0.00076	1.85	NA	NA	NA	NA	NA	NA	NA	NA	-0.620535	0.0026983	-0.326092	0.00441252	-0.0208341	0.00260502	-0.637213	0.00966465	-0.537157	0.0301283	NA	NA	NA	NA	NA	NA	NA	NA	NA	NA
111	111	42	祁连山黑河上游不同退化草地土壤理化性质及养分和酶活性的变化规律	100.752	38.0819	LD	meadow	0-10	NA	NA	NA	NA	NA	NA	NA	NA	0.0307717	0.00666667	0.011487	0.00666667	0.09	NA	NA	0.127657	0.00666667	0.172736	0.00666667	-0.0463741	0.00666667	-0.087943	0.00666667	NA	NA	NA	NA	-0.105361	0.00666667	-0.163135	0.00666667	-0.0408245	0.00666667	NA	NA	NA	NA	NA	NA	NA	NA
112	112	42	祁连山黑河上游不同退化草地土壤理化性质及养分和酶活性的变化规律	100.752	38.0819	HD	meadow	0-10	NA	NA	NA	NA	NA	NA	NA	NA	0.0990909	0.00666667	0.0253499	0.00666667	0.2	NA	NA	0.233264	0.00666667	0.33575	0.00666667	-0.0914923	0.00666667	-0.212873	0.00666667	NA	NA	NA	NA	-0.233212	0.00666667	-0.326833	0.00666667	-0.081678	0.00666667	NA	NA	NA	NA	NA	NA	NA	NA
113	113	42	祁连山黑河上游不同退化草地土壤理化性质及养分和酶活性的变化规律	100.752	38.0819	ED	meadow	0-10	NA	NA	NA	NA	NA	NA	NA	NA	0.180584	0.00666667	0.0315882	0.00666667	0.25	NA	NA	0.348189	0.00666667	0.487319	0.00666667	-0.149209	0.00666667	-0.309689	0.00666667	NA	NA	NA	NA	-0.395882	0.00666667	-0.500841	0.00666667	-0.132944	0.00666667	NA	NA	NA	NA	NA	NA	NA	NA
114	114	43	青藏高原高寒草甸的植被退化_x000D_ 与土壤退化特征研究	99.8494	34.4745	LD	meadow	0-20	-0.0583176	0.00135032	0.213193	0.00900473	-0.0842603	0.0196945	0.377027	0.0054005	0.333144	0.00333333	NA	NA	0	-0.149096	0.00333333	NA	NA	NA	NA	NA	NA	-0.125833	0.168333	NA	NA	NA	NA	0.07437	0.00333333	-0.0225998	0.00333333	-0.130842	0.00333333	NA	NA	NA	NA	NA	NA	NA	NA
115	115	43	青藏高原高寒草甸的植被退化_x000D_ 与土壤退化特征研究	99.8494	34.4745	MD	meadow	0-20	-0.19969	0.00322037	0.0562851	0.0136684	-0.313835	0.0470189	0.707069	0.00554727	0.428455	0.00333333	NA	NA	0	-0.3051	0.00333333	NA	NA	NA	NA	NA	NA	-0.427341	0.00333333	NA	NA	NA	NA	0.10516	0.00333333	-0.0496285	0.00333333	-0.187931	0.00333333	NA	NA	NA	NA	NA	NA	NA	NA
116	116	43	青藏高原高寒草甸的植被退化_x000D_ 与土壤退化特征研究	99.8494	34.4745	HD	meadow	0-20	-0.316869	0.0033766	-0.178112	0.00622234	-1.08856	0.0237368	0.536657	0.0106578	0.458308	0.00333333	NA	NA	0	-0.327894	0.00333333	NA	NA	NA	NA	NA	NA	-0.650781	0.00333333	NA	NA	NA	NA	-0.169103	0.00333333	-0.0784146	0.00333333	-0.441211	0.00333333	NA	NA	NA	NA	NA	NA	NA	NA
117	117	43	青藏高原高寒草甸的植被退化_x000D_ 与土壤退化特征研究	99.8494	34.4745	ED	meadow	0-20	-0.581815	0.0207677	-0.273576	0.0311222	-1.08856	0.0175535	0.389766	0.00746438	0.601899	0.0320195	NA	NA	0	-0.715927	0.00333333	NA	NA	NA	NA	NA	NA	-0.752035	0.00333333	NA	NA	NA	NA	-1.40872	0.00333333	-0.345827	0.00333333	-0.456791	0.00333333	NA	NA	NA	NA	NA	NA	NA	NA
118	118	44	青藏高原退化草甸土壤微生物量、酶化学计量学特征及其影响因素	91.0833	30.85	LD	meadow	0-10	-0.12658	0.000104404	NA	NA	NA	NA	NA	NA	NA	NA	0.0336423	5.54639e-05	0.22	-0.0203338	0.00320248	NA	NA	NA	NA	NA	NA	-0.0203338	0.00320248	-0.312788	0.00723373	0.0416727	0.00244462	NA	NA	0.10638	0.00682268	-0.0962254	0.0109602	-0.220051	0.00119269	NA	NA	NA	NA	-0.255289	0.00111958
119	119	44	青藏高原退化草甸土壤微生物量、酶化学计量学特征及其影响因素	91.0833	30.85	MD	meadow	0-10	-0.241355	7.49221e-05	NA	NA	NA	NA	NA	NA	NA	NA	0.0530026	5.00596e-05	0.35	-0.239878	0.00357096	NA	NA	NA	NA	NA	NA	-0.239878	0.00357096	-0.621403	0.00650381	-0.323787	0.0010542	NA	NA	-0.160121	0.00604399	-0.202496	0.0209607	-0.271296	0.00158086	NA	NA	NA	NA	-0.49967	0.00161886
120	120	44	青藏高原退化草甸土壤微生物量、酶化学计量学特征及其影响因素	91.0833	30.85	HD	meadow	0-10	-0.871654	0.000456735	NA	NA	NA	NA	NA	NA	NA	NA	0.0705469	0.000133701	0.47	-0.409757	0.00305866	NA	NA	NA	NA	NA	NA	-0.409757	0.00305866	-0.825499	0.0141642	-0.44895	0.00836215	NA	NA	-0.160121	0.0396917	-0.197692	0.0137991	-0.278974	0.00127247	NA	NA	NA	NA	-0.922953	0.00272996
121	121	45	三江源区不同退化梯度高寒草原土壤重金属含量及其 与养分和酶活性的变化特征	90.3333	33.8333	LD	meadow	0-10	-0.190857	0.00666667	NA	NA	NA	NA	NA	NA	0.106107	0.00666667	0.00609386	5.59968e-05	0.05	NA	NA	NA	NA	NA	NA	NA	NA	NA	NA	-1.08558	0.103079	-0.600774	0.0392997	NA	NA	NA	NA	NA	NA	NA	NA	-1.34528	0.183462	0.156673	0.0931164	NA	NA
122	122	45	三江源区不同退化梯度高寒草原土壤重金属含量及其 与养分和酶活性的变化特征	90.3333	33.8333	MD	meadow	0-10	-0.276494	0.00666667	NA	NA	NA	NA	NA	NA	0.177334	0.00666667	-0.0348294	0.000152056	-0.28	NA	NA	NA	NA	NA	NA	NA	NA	NA	NA	-0.785838	0.0933309	0.0775582	0.0587449	NA	NA	NA	NA	NA	NA	NA	NA	-1.18362	0.127367	-0.172717	0.0951714	NA	NA
123	123	45	三江源区不同退化梯度高寒草原土壤重金属含量及其 与养分和酶活性的变化特征	90.3333	33.8333	HD	meadow	0-10	-0.4988	0.00666667	NA	NA	NA	NA	NA	NA	0.208106	0.00666667	-0.051422	5.89366e-05	-0.41	NA	NA	NA	NA	NA	NA	NA	NA	NA	NA	-2.10939	0.0937463	-0.276987	0.0564154	NA	NA	NA	NA	NA	NA	NA	NA	-2.77035	0.102027	0.00903692	0.14271	NA	NA
124	124	46	三江源区不同退化演替阶段高寒草甸土壤酶活性和微生物群落结构的变化	100.483	34.5	LD	meadow	0-10	NA	NA	NA	NA	NA	NA	NA	NA	NA	NA	NA	NA	NA	NA	NA	NA	NA	NA	NA	NA	NA	NA	NA	NA	NA	NA	NA	NA	NA	NA	NA	NA	NA	NA	NA	NA	NA	NA	NA	NA	NA
125	125	46	三江源区不同退化演替阶段高寒草甸土壤酶活性和微生物群落结构的变化	100.483	34.5	MD	meadow	0-10	NA	NA	NA	NA	NA	NA	NA	NA	NA	NA	NA	NA	NA	NA	NA	NA	NA	NA	NA	NA	NA	NA	NA	NA	NA	NA	NA	NA	NA	NA	NA	NA	NA	NA	NA	NA	NA	NA	NA	NA	NA
126	126	46	三江源区不同退化演替阶段高寒草甸土壤酶活性和微生物群落结构的变化	100.483	34.5	HD	meadow	0-10	NA	NA	NA	NA	NA	NA	NA	NA	NA	NA	NA	NA	NA	NA	NA	NA	NA	NA	NA	NA	NA	NA	NA	NA	NA	NA	NA	NA	NA	NA	NA	NA	NA	NA	NA	NA	NA	NA	NA	NA	NA
127	127	47	三江源区高寒草甸不同退化程度草地_x000D_ 特征的调查与分析	97.1351	33.8138	LD	meadow	0-10	NA	NA	NA	NA	NA	NA	NA	NA	NA	NA	NA	NA	NA	NA	NA	NA	NA	NA	NA	NA	NA	0.0190029	0.005	-0.146328	0.005	-0.0173917	0.005	-0.020432	0.005	-0.182322	0.005	-0.186756	0.005	NA	NA	NA	NA	NA	NA	NA	NA
128	128	47	三江源区高寒草甸不同退化程度草地_x000D_ 特征的调查与分析	97.1351	33.8138	HD	meadow	0-10	NA	NA	NA	NA	NA	NA	NA	NA	NA	NA	NA	NA	NA	NA	NA	NA	NA	NA	NA	NA	NA	-0.283693	0.005	-0.263543	0.005	-0.109199	0.005	-0.0941872	0.005	-0.34484	0.005	-0.292858	0.005	NA	NA	NA	NA	NA	NA	NA	NA
129	129	47	三江源区高寒草甸不同退化程度草地_x000D_ 特征的调查与分析	97.1351	33.8138	ED	meadow	0-10	NA	NA	NA	NA	NA	NA	NA	NA	NA	NA	NA	NA	NA	NA	NA	NA	NA	NA	NA	NA	NA	-0.391179	0.005	-1.29623	0.005	-0.168623	0.005	-0.20643	0.005	-0.405465	0.005	-0.484264	0.005	NA	NA	NA	NA	NA	NA	NA	NA
130	130	48	三江源区高寒草甸退化对土壤养分 和土壤酶活性影响的研究	98.8	33.7167	MD	meadow	0-10	NA	NA	NA	NA	NA	NA	NA	NA	NA	NA	NA	NA	NA	NA	NA	NA	NA	NA	NA	NA	NA	0.00536194	0.00333333	-0.0289113	0.00333333	-0.262087	0.00333333	-0.350524	0.00333333	-0.0363676	0.00333333	-0.0128207	0.00333333	NA	NA	NA	NA	NA	NA	NA	NA
131	131	48	三江源区高寒草甸退化对土壤养分 和土壤酶活性影响的研究	98.8	33.7167	HD	meadow	0-10	NA	NA	NA	NA	NA	NA	NA	NA	NA	NA	NA	NA	NA	NA	NA	NA	NA	NA	NA	NA	NA	0.118977	0.00333333	0.128662	0.00333333	-0.0630581	0.00333333	-0.530961	0.00333333	0.0948462	0.00333333	0.316715	0.00333333	NA	NA	NA	NA	NA	NA	NA	NA
132	132	48	三江源区高寒草甸退化对土壤养分 和土壤酶活性影响的研究	98.8	33.7167	ED	meadow	0-10	NA	NA	NA	NA	NA	NA	NA	NA	NA	NA	NA	NA	NA	NA	NA	NA	NA	NA	NA	NA	NA	0	0.00333333	-0.0369435	0.00333333	0.0902469	0.00333333	0.330761	0.00333333	0.146835	0.00333333	-0.158406	0.00333333	NA	NA	NA	NA	NA	NA	NA	NA
133	133	49	退化高寒草原土壤生物学性质的变化	95.0167	36.6833	MD	steppe	0-10	NA	NA	NA	NA	NA	NA	NA	NA	NA	NA	-0.0469019	0.00666667	-0.4	NA	NA	NA	NA	NA	NA	NA	NA	NA	NA	0.127445	0.00666667	NA	NA	0.128703	0.00666667	0.0365337	0.00666667	-0.0221847	0.00666667	NA	NA	NA	NA	NA	NA	0.768545	0.00114911
134	134	49	退化高寒草原土壤生物学性质的变化	95.0167	36.6833	HD	steppe	0-10	NA	NA	NA	NA	NA	NA	NA	NA	NA	NA	-0.16124	0.00666667	-1.3	NA	NA	NA	NA	NA	NA	NA	NA	NA	NA	-0.415221	0.00666667	NA	NA	-0.396104	0.00666667	-0.510826	0.00666667	-0.161251	0.00666667	NA	NA	NA	NA	NA	NA	-0.265179	0.000683821
135	135	49	退化高寒草原土壤生物学性质的变化	95.0167	36.6833	ED	steppe	0-10	NA	NA	NA	NA	NA	NA	NA	NA	NA	NA	-0.119073	0.00666667	-0.98	NA	NA	NA	NA	NA	NA	NA	NA	NA	NA	-0.655047	0.00666667	NA	NA	-0.39308	0.00666667	0.718407	0.00666667	-0.241665	0.00666667	NA	NA	NA	NA	NA	NA	-2.08347	0.00192507
136	136	50	西藏不同退化高寒草地土壤酶的活性	91.6833	31.45	MD	meadow	0-10	NA	NA	NA	NA	NA	NA	NA	NA	NA	NA	-0.0469019	0.00666667	NA	NA	NA	0.0598185	0.00666667	-0.250578	0.00666667	-0.0266682	0.00666667	0.209423	0.00666667	NA	NA	NA	NA	NA	NA	NA	NA	NA	NA	NA	NA	NA	NA	NA	NA	NA	NA
137	137	50	西藏不同退化高寒草地土壤酶的活性	91.6833	31.45	HD	meadow	0-10	NA	NA	NA	NA	NA	NA	NA	NA	NA	NA	-0.16124	0.00666667	NA	NA	NA	0.0990392	0.00666667	-0.415828	0.00666667	-0.141079	0.00666667	-0.515231	0.00666667	NA	NA	NA	NA	NA	NA	NA	NA	NA	NA	NA	NA	NA	NA	NA	NA	NA	NA
138	138	50	西藏不同退化高寒草地土壤酶的活性	91.6833	31.45	ED	meadow	0-10	NA	NA	NA	NA	NA	NA	NA	NA	NA	NA	-0.119073	0.00666667	NA	NA	NA	0.176597	0.00666667	-1.0782	0.00666667	-0.187599	0.00666667	-1.2856	0.00666667	NA	NA	NA	NA	NA	NA	NA	NA	NA	NA	NA	NA	NA	NA	NA	NA	NA	NA
139	139	51	A comparison of biodiversity–ecosystem function relationships in alpine grasslands across a degradation gradient on the Qinghai–Tibetan Plateau	100.268	34.427	MD	meadow	0-30	NA	NA	NA	NA	NA	NA	-0.197064	0.00355028	0.116884	0.0146402	NA	NA	NA	NA	NA	NA	NA	NA	NA	NA	NA	-0.216277	0.00265724	-0.337748	0.00372037	NA	NA	NA	NA	NA	NA	NA	NA	NA	NA	NA	NA	NA	NA	NA	NA
140	140	51	A comparison of biodiversity–ecosystem function relationships in alpine grasslands across a degradation gradient on the Qinghai–Tibetan Plateau	100.268	34.427	HD	meadow	0-30	NA	NA	NA	NA	NA	NA	-0.399386	0.0026608	0.179622	0.0150494	NA	NA	NA	NA	NA	NA	NA	NA	NA	NA	NA	-0.492843	0.00615367	-0.40117	0.00387313	NA	NA	NA	NA	NA	NA	NA	NA	NA	NA	NA	NA	NA	NA	NA	NA
141	141	52	Above- and Belowground Response along Degradation Gradient in an Alpine Grassland of the Qinghai-Tibetan Plateau	99.5058	34.2061	LD	meadow	0-10	-0.100644	0.004	-0.387904	0.004	NA	NA	0.109199	0.004	NA	NA	0.0157484	0.0779048	0.1	0.0688817	0.105245	NA	NA	NA	NA	NA	NA	NA	NA	NA	NA	NA	NA	0.406018	0.0926112	-0.217065	0.105545	-0.0513432	0.0464399	NA	NA	NA	NA	NA	NA	NA	NA
142	142	52	Above- and Belowground Response along Degradation Gradient in an Alpine Grassland of the Qinghai-Tibetan Plateau	99.5058	34.2061	MD	meadow	0-10	-0.368908	0.004	-0.641985	0.004	NA	NA	0.146127	0.004	NA	NA	0.0297129	0.0507831	0.19	0.0420556	0.106103	NA	NA	NA	NA	NA	NA	NA	NA	NA	NA	NA	NA	0.0387204	0.111306	-0.346276	0.081244	-0.138738	0.070837	NA	NA	NA	NA	NA	NA	NA	NA
143	143	52	Above- and Belowground Response along Degradation Gradient in an Alpine Grassland of the Qinghai-Tibetan Plateau	99.5058	34.2061	HD	meadow	0-10	-0.829723	0.004	-0.793852	0.004	NA	NA	-0.16293	0.004	NA	NA	0.040441	0.0688638	0.26	-0.0757774	0.12519	NA	NA	NA	NA	NA	NA	NA	NA	NA	NA	NA	NA	-0.370902	0.096713	-0.346276	0.081244	-0.0223747	0.0835642	NA	NA	NA	NA	NA	NA	NA	NA
144	144	52	Above- and Belowground Response along Degradation Gradient in an Alpine Grassland of the Qinghai-Tibetan Plateau	99.5058	34.2061	ED	meadow	0-10	-1.32442	0.004	-2.26019	0.004	NA	NA	-0.562242	0.004	NA	NA	0.0525623	0.0686904	0.34	-0.181988	0.0852202	NA	NA	NA	NA	NA	NA	NA	NA	NA	NA	NA	NA	-0.770702	0.0865078	-0.455476	0.0882676	-0.261785	0.0819102	NA	NA	NA	NA	NA	NA	NA	NA
145	145	53	Assessing the soil quality of alpine grasslands in the Qinghai-Tibetan Plateau using a modified soil quality index	100.211	34.4697	MD	meadow	0-4	NA	NA	-0.166815	0.00118466	-0.187809	5.55095e-05	NA	NA	NA	NA	0.086533	0.000125191	0.63	NA	NA	NA	NA	NA	NA	NA	NA	-0.254075	0.0218329	-0.24686	0.000318417	-0.133531	0.00160095	NA	NA	NA	NA	NA	NA	NA	NA	NA	NA	NA	NA	-0.411507	0.0052794
146	146	53	Assessing the soil quality of alpine grasslands in the Qinghai-Tibetan Plateau using a modified soil quality index	100.211	34.4697	HD	meadow	0-4	NA	NA	-0.444901	0.0369873	-0.461187	2.51419e-05	NA	NA	NA	NA	0.134069	0.000141671	1	NA	NA	NA	NA	NA	NA	NA	NA	-0.340098	0.0187948	-0.478372	0.00029323	-0.199129	0.000640233	NA	NA	NA	NA	NA	NA	NA	NA	NA	NA	NA	NA	-0.634651	0.00638822
147	147	53	Assessing the soil quality of alpine grasslands in the Qinghai-Tibetan Plateau using a modified soil quality index	100.211	34.4697	ED	meadow	0-4	NA	NA	-0.545078	0.00787925	-0.986863	1.05205e-05	NA	NA	NA	NA	0.147777	0.000134338	1.11	NA	NA	NA	NA	NA	NA	NA	NA	-0.584655	0.0194591	-0.603535	0.000837238	-0.251314	0.000363494	NA	NA	NA	NA	NA	NA	NA	NA	NA	NA	NA	NA	-1.37432	0.00559449
148	148	54	CHANGES IN PLANT DIVERSITY, BIOMASS AND SOIL C, IN ALPINE MEADOWS AT DIFFERENT DEGRADATION STAGES IN THE HEADWATER REGION OF THREE RIVERS, CHI	100.098	34.5067	LD	meadow	0-10	NA	NA	0.0413405	0.000313893	0.241329	0.00375846	0.0267475	0.00333333	0.212455	0.0023866	NA	NA	NA	-0.319858	0.00223478	NA	NA	NA	NA	NA	NA	-0.720248	0.00223082	-0.465363	0.000589179	-0.287682	0.00376157	0.0548369	0.00307932	0.0612436	0.00872425	NA	NA	NA	NA	NA	NA	NA	NA	-0.0790341	0.00200552
149	149	54	CHANGES IN PLANT DIVERSITY, BIOMASS AND SOIL C, IN ALPINE MEADOWS AT DIFFERENT DEGRADATION STAGES IN THE HEADWATER REGION OF THREE RIVERS, CHI	100.098	34.5067	MD	meadow	0-10	NA	NA	0.00192071	0.000268779	-0.216804	0.00449589	0.0296758	0.00333333	0.307544	0.000251212	NA	NA	NA	-0.496263	0.00122743	NA	NA	NA	NA	NA	NA	-0.868736	0.000502254	-0.670158	0.0172338	-0.470004	0.00427083	-0.0283676	0.00148051	-0.317358	0.0130135	NA	NA	NA	NA	NA	NA	NA	NA	-0.564434	0.00140128
150	150	54	CHANGES IN PLANT DIVERSITY, BIOMASS AND SOIL C, IN ALPINE MEADOWS AT DIFFERENT DEGRADATION STAGES IN THE HEADWATER REGION OF THREE RIVERS, CHI	100.098	34.5067	HD	meadow	0-10	NA	NA	-0.208155	0.000613493	-1.1182	0.00312368	-0.225405	0.00333333	0.364169	0.000168059	NA	NA	NA	-0.794301	0.00224689	NA	NA	NA	NA	NA	NA	-1.31804	0.000470106	-0.870828	0.000874959	-0.287682	0.00376157	-0.318561	0.00465147	-0.199307	0.0125217	NA	NA	NA	NA	NA	NA	NA	NA	-0.80608	0.00144433
151	151	54	CHANGES IN PLANT DIVERSITY, BIOMASS AND SOIL C, IN ALPINE MEADOWS AT DIFFERENT DEGRADATION STAGES IN THE HEADWATER REGION OF THREE RIVERS, CHI	100.098	34.5067	ED	meadow	0-10	NA	NA	-1.20008	0.00918342	-1.43337	0.00180406	-0.299803	0.00333333	0.401109	0.000910851	NA	NA	NA	-1.05091	0.00189412	NA	NA	NA	NA	NA	NA	-1.462	0.0012913	-1.27629	0.00151796	-0.287682	0.00376157	-0.877881	0.00701474	0.0310906	0.0126612	NA	NA	NA	NA	NA	NA	NA	NA	-1.34435	0.002269
152	152	55	Changes of soil microbial community under different degraded gradients of alpine meadow	92.1	31.2833	LD	meadow	0-10	-0.121697	0.00066214	-0.0154343	0.00970782	-0.0478074	0.000408585	0.657215	0.00148314	NA	NA	0.0398767	0.000477134	0.31	NA	NA	0.294622	0.00147545	-0.14425	0.000716732	-0.432133	0.00258081	-0.158155	0.00154051	-0.0959003	0.00161104	-0.192372	0.000385818	-0.432133	0.00148456	-0.192521	0.00125263	-0.195309	0.00124083	NA	NA	NA	NA	NA	NA	-0.149532	0.0286554
153	153	55	Changes of soil microbial community under different degraded gradients of alpine meadow	92.1	31.2833	MD	meadow	0-10	-0.613104	0.0533629	-0.58163	0.0390325	-1.55917	0.00789951	-0.331777	0.00297234	NA	NA	0.146246	0.000497621	1.2	NA	NA	0.516935	0.00124646	-0.34246	0.000519289	-0.98905	0.00454817	-0.754972	0.000857799	-1.71513	0.0177566	-1.3375	0.00242382	-1.29578	0.00177499	-1.05851	0.00104174	-0.603719	0.000809967	NA	NA	NA	NA	NA	NA	-0.492476	0.0213562
154	154	56	Comparison of ecosystem characteristics between degraded and intact alpine meadow in the Qinghai-Tibetan Plateau, Chi	92.9167	34.8167	MD	meadow	0-10	-0.260952	0.0046333	-0.104103	0.00829708	-0.373287	0.00524646	NA	NA	0.324904	0.00245906	NA	NA	NA	NA	NA	NA	NA	NA	NA	NA	NA	-0.829347	0.0103907	NA	NA	NA	NA	NA	NA	NA	NA	NA	NA	NA	NA	NA	NA	NA	NA	NA	NA
155	155	57	Effects of establishing an artificial grassland on vegetation characteristics and soil quality in a degraded meadow	100.5	34.3667	HD	meadow	0-10	-0.693147	0.00102466	-0.441306	0.000886016	-1.0661	0.00271931	-0.402411	0.00222937	NA	NA	NA	NA	NA	NA	NA	NA	NA	NA	NA	NA	NA	-1.19463	0.00120376	NA	NA	NA	NA	NA	NA	NA	NA	NA	NA	NA	NA	NA	NA	NA	NA	-2.44819	0.0201451
156	156	58	Effects of Grassland Degradation and Re-vegetation on Carbon and Nitrogen Storage in the Soils of the Headwater Area ture Reserve on the Qinghai-Tibetan Plateau, Chi	100.211	34.4697	ED	meadow	0-20	NA	NA	NA	NA	NA	NA	NA	NA	0.108803	0.00190426	0.0635134	0.000574473	0.4	-0.344276	0.0154653	NA	NA	NA	NA	NA	NA	-1.37213	0.000332603	-1.34683	0.00132198	NA	NA	NA	NA	NA	NA	NA	NA	NA	NA	NA	NA	NA	NA	NA	NA
157	157	59	Impact of alpine meadow degradation on soil hydraulic properties over the Qinghai-Tibetan Plateau	91.5667	31.2667	MD	meadow	0-10	-0.338956	0.004273	NA	NA	NA	NA	NA	NA	0.280077	0.0217476	NA	NA	NA	-0.382274	0.0135245	0.743108	0.0819792	-0.384273	0.0706278	-1.11135	0.158064	-0.871537	0.0103362	NA	NA	NA	NA	NA	NA	NA	NA	NA	NA	NA	NA	NA	NA	NA	NA	NA	NA
158	158	59	Impact of alpine meadow degradation on soil hydraulic properties over the Qinghai-Tibetan Plateau	91.5667	31.2667	ED	meadow	0-10	-2.29921	0.00992278	NA	NA	NA	NA	NA	NA	0.332134	0.0201139	NA	NA	NA	-0.544195	0.0142322	1.28842	0.0319276	-1.83554	0.159552	-2.42354	0.220189	-2.02422	0.00654456	NA	NA	NA	NA	NA	NA	NA	NA	NA	NA	NA	NA	NA	NA	NA	NA	NA	NA
159	159	60	Influences of the degradation of swamp and alpine meadows on CO2 emission during growing season on the Qinghai-Tibet Plateau	92.8949	34.728	ED	meadow	0-10	NA	NA	-0.654552	0.00400111	-1.04208	0.000488646	NA	NA	0.428455	0.0291349	NA	NA	NA	NA	NA	NA	NA	NA	NA	NA	NA	-1.05065	0.108965	NA	NA	NA	NA	-0.336062	0.00306387	NA	NA	NA	NA	NA	NA	NA	NA	NA	NA	NA	NA
160	160	61	Recruitment of seedlings versus ramets as affected by pasture degradation in alpine meadows and the implications for ecological restoration	100.033	34.45	LD	meadow	0-10	NA	NA	NA	NA	NA	NA	NA	NA	NA	NA	0.133531	1.45266e-05	0.9	-0.84369	0.000137702	NA	NA	NA	NA	NA	NA	-1.14637	0.00325455	-0.499494	0.00202466	-0.538997	0.00136763	NA	NA	NA	NA	NA	NA	NA	NA	NA	NA	NA	NA	NA	NA
161	161	61	Recruitment of seedlings versus ramets as affected by pasture degradation in alpine meadows and the implications for ecological restoration	100.033	34.45	MD	meadow	0-10	NA	NA	NA	NA	NA	NA	NA	NA	NA	NA	0.174353	1.43754e-05	1.2	-0.916291	7.69342e-05	NA	NA	NA	NA	NA	NA	-0.910264	0.00557757	-0.736822	0.00310179	-0.538997	0.00136763	NA	NA	NA	NA	NA	NA	NA	NA	NA	NA	NA	NA	NA	NA
162	162	62	Seasol changes of CO2, CH4 and N2O fluxes in different types of alpine grassland in the Qinghai-Tibetan Plateau of Chi	101.2	37.6	LD	meadow	0-5	-0.187141	0.00421807	-0.318176	0.0385485	-0.343772	0.00337283	NA	NA	0.346871	0.0073592	0.0761103	3.82165e-05	0.62	-0.460652	0.00623884	0.902289	0.000128324	-0.40709	1.11265e-05	-0.34873	0.000664153	-0.455916	0.0148564	-0.782759	0.000331699	NA	NA	NA	NA	NA	NA	NA	NA	NA	NA	-0.552173	0.0139999	-0.298367	0.0192914	NA	NA
163	163	63	Soil carbon and nitrogen pools and their relationship to plant and soil dymics of degraded and artificially restored grasslands of the Qinghai–Tibetan Plateau	100.211	34.4697	MD	meadow	0-4	-0.0833816	0.000118167	-0.582377	0.00602038	-0.729832	6.23168e-05	-0.21441	0.00116715	0.325422	0.000678592	0.0317487	0.00122542	0.2	-0.368093	0.000345256	NA	NA	NA	NA	NA	NA	NA	NA	NA	NA	NA	NA	NA	NA	NA	NA	NA	NA	NA	NA	NA	NA	NA	NA	NA	NA
164	164	63	Soil carbon and nitrogen pools and their relationship to plant and soil dymics of degraded and artificially restored grasslands of the Qinghai–Tibetan Plateau	100.211	34.4697	HD	meadow	0-4	-0.0618754	0.000209635	-0.750207	0.0152927	-1.34881	0.00299631	-0.168384	0.00162755	0.465874	0.000579045	0.131311	0.00159511	0.87	-0.382551	7.19361e-05	NA	NA	NA	NA	NA	NA	NA	NA	NA	NA	NA	NA	NA	NA	NA	NA	NA	NA	NA	NA	NA	NA	NA	NA	NA	NA
165	165	63	Soil carbon and nitrogen pools and their relationship to plant and soil dymics of degraded and artificially restored grasslands of the Qinghai–Tibetan Plateau	100.211	34.4697	ED	meadow	0-4	-0.116534	0.000190398	-0.794457	0.0133679	-2.20247	0.0123614	-0.297476	0.00259474	0.514993	0.00121497	0.22056	0.000878167	1.53	-0.644672	0.00010577	NA	NA	NA	NA	NA	NA	NA	NA	NA	NA	NA	NA	NA	NA	NA	NA	NA	NA	NA	NA	NA	NA	NA	NA	NA	NA
166	166	64	Soil seed bank and its relation with above-ground vegetation along the degraded gradients of alpine meadow	100.034	34.5278	LD	meadow	0-10	NA	NA	NA	NA	NA	NA	NA	NA	NA	NA	0.144059	1.97683e-06	0.97	-0.842691	0.000137406	NA	NA	NA	NA	NA	NA	-0.731002	0.000645609	-0.499494	0.00202466	-0.538997	0.000683815	-0.647246	9.42868e-05	-0.0534149	0.000816722	NA	NA	NA	NA	NA	NA	NA	NA	NA	NA
167	167	64	Soil seed bank and its relation with above-ground vegetation along the degraded gradients of alpine meadow	100.034	34.5278	MD	meadow	0-10	NA	NA	NA	NA	NA	NA	NA	NA	NA	NA	0.179389	1.84632e-06	1.23	-0.915809	7.68472e-05	NA	NA	NA	NA	NA	NA	-1.08021	0.000566676	-0.736822	0.00310179	-0.538997	0.000683815	-0.889567	0.000278759	-0.252514	0.00148533	NA	NA	NA	NA	NA	NA	NA	NA	NA	NA
168	168	65	Soil-Quality Effects of Grassland Degradation and Restoration on the Qinghai-Tibetan Plateau	100.211	34.4697	MD	meadow	0-4	-0.016878	9.81667e-05	NA	NA	NA	NA	NA	NA	0.424883	0.0118306	NA	NA	NA	-0.722135	0.0231942	NA	NA	NA	NA	NA	NA	-0.92655	0.00590966	-0.780095	0.0431994	-0.183156	0.00164536	0.725162	0.000300492	-0.310548	0.0014881	-0.248139	0.00057867	NA	NA	NA	NA	NA	NA	NA	NA
169	169	65	Soil-Quality Effects of Grassland Degradation and Restoration on the Qinghai-Tibetan Plateau	100.211	34.4697	HD	meadow	0-4	-0.0526155	0.000143689	NA	NA	NA	NA	NA	NA	0.302281	0.0182633	NA	NA	NA	-0.336472	0.0353742	NA	NA	NA	NA	NA	NA	-1.13167	0.000901446	-0.766448	0.0258964	-0.10292	0.00150651	0.423729	0.000232425	-0.615299	0.000937748	0.384301	0.000526764	NA	NA	NA	NA	NA	NA	NA	NA
170	170	65	Soil-Quality Effects of Grassland Degradation and Restoration on the Qinghai-Tibetan Plateau	100.211	34.4697	ED	meadow	0-4	-0.144953	0.000288412	NA	NA	NA	NA	NA	NA	-0.0482021	0.0203969	NA	NA	NA	-0.847298	0.170189	NA	NA	NA	NA	NA	NA	-1.18481	0.000738954	-0.793931	0.0157252	-0.150984	0.000469124	-0.05009	0.000348438	-0.59572	0.00578401	-0.107108	0.000650651	NA	NA	NA	NA	NA	NA	NA	NA
171	171	66	THE EFFECT OF LAND MAGEMENT ON CARBON AND NITROGEN STATUS IN PLANTS AND SOILS OF ALPINE MEADOWS ON THE TIBETAN PLATEAU	98.25	32.6167	ED	meadow	0-10	NA	NA	NA	NA	-1.91571	0.0384795	NA	NA	0.463035	0.00683182	NA	NA	NA	NA	NA	NA	NA	NA	NA	NA	NA	-0.560312	0.00494466	-0.334261	0.0113837	NA	NA	NA	NA	NA	NA	NA	NA	NA	NA	NA	NA	NA	NA	NA	NA
172	172	67	The effects of fencing on carbon stocks in the degraded alpine grasslands of the Qinghai-Tibetan Plateau	100.211	34.4697	MD	meadow	0-4	NA	NA	NA	NA	NA	NA	NA	NA	1.15396	0.00715833	0.177608	6.62217e-05	1.24	NA	NA	0.0227356	0.000279846	NA	NA	NA	NA	NA	NA	NA	NA	NA	NA	NA	NA	NA	NA	NA	NA	NA	NA	NA	NA	NA	NA	NA	NA
173	173	67	The effects of fencing on carbon stocks in the degraded alpine grasslands of the Qinghai-Tibetan Plateau	100.211	34.4697	HD	meadow	0-4	NA	NA	NA	NA	NA	NA	NA	NA	0.520534	0.025062	0.230016	6.25656e-05	1.65	NA	NA	0.0333831	0.000331728	NA	NA	NA	NA	NA	NA	NA	NA	NA	NA	NA	NA	NA	NA	NA	NA	NA	NA	NA	NA	NA	NA	NA	NA
174	174	67	The effects of fencing on carbon stocks in the degraded alpine grasslands of the Qinghai-Tibetan Plateau	100.211	34.4697	ED	meadow	0-4	NA	NA	NA	NA	NA	NA	NA	NA	0.752336	0.0145812	0.233745	8.07916e-05	1.68	NA	NA	0.0546549	0.000337166	NA	NA	NA	NA	NA	NA	NA	NA	NA	NA	NA	NA	NA	NA	NA	NA	NA	NA	NA	NA	NA	NA	NA	NA
175	175	68	The effects of grassland degradation on plant diversity, primary productivity, and soil fertility in the alpine region of Asia’s headwaters	100.286	34.4294	LD	meadow	0-10	NA	NA	NA	NA	NA	NA	-0.0877568	0.0622203	0.0535842	0.00505179	-0.00141143	0.000103648	-0.01	-0.0019274	0.00724994	NA	NA	NA	NA	NA	NA	NA	NA	NA	NA	NA	NA	NA	NA	NA	NA	NA	NA	NA	NA	NA	NA	NA	NA	NA	NA
176	176	68	The effects of grassland degradation on plant diversity, primary productivity, and soil fertility in the alpine region of Asia’s headwaters	100.286	34.4294	MD	meadow	0-10	NA	NA	NA	NA	NA	NA	-0.181502	0.0141887	0.104443	0.00469345	-0.00141143	4.97839e-05	-0.01	-0.0432854	0.0166481	NA	NA	NA	NA	NA	NA	NA	NA	NA	NA	NA	NA	NA	NA	NA	NA	NA	NA	NA	NA	NA	NA	NA	NA	NA	NA
177	177	68	The effects of grassland degradation on plant diversity, primary productivity, and soil fertility in the alpine region of Asia’s headwaters	100.286	34.4294	HD	meadow	0-10	NA	NA	NA	NA	NA	NA	-0.444112	0.0136687	0.160682	0.00354395	0	8.15627e-05	0	-0.168047	0.0420515	NA	NA	NA	NA	NA	NA	NA	NA	NA	NA	NA	NA	NA	NA	NA	NA	NA	NA	NA	NA	NA	NA	NA	NA	NA	NA
178	178	68	The effects of grassland degradation on plant diversity, primary productivity, and soil fertility in the alpine region of Asia’s headwaters	100.286	34.4294	ED	meadow	0-10	NA	NA	NA	NA	NA	NA	-0.713852	0.0142889	0.176187	0.00347687	-0.00141143	8.17032e-05	-0.01	-0.273238	0.0146236	NA	NA	NA	NA	NA	NA	NA	NA	NA	NA	NA	NA	NA	NA	NA	NA	NA	NA	NA	NA	NA	NA	NA	NA	NA	NA
179	179	69	The impact of land degradation on the C pools in alpine grasslands of the Qinghai-Tibet Plateau	100.5	34.366	MD	meadow	0-4	NA	NA	-0.251314	0.000390177	-1.0033	0.0325224	NA	NA	NA	NA	NA	NA	NA	NA	NA	NA	NA	NA	NA	NA	NA	-0.871386	0.000959409	NA	NA	NA	NA	NA	NA	NA	NA	NA	NA	NA	NA	NA	NA	NA	NA	-0.429137	4.51587e-05
180	180	69	The impact of land degradation on the C pools in alpine grasslands of the Qinghai-Tibet Plateau	100.5	34.366	HD	meadow	0-4	NA	NA	-0.621688	0.00509918	-1.49737	0.0765077	NA	NA	NA	NA	NA	NA	NA	NA	NA	NA	NA	NA	NA	NA	NA	-1.16275	0.00118616	NA	NA	NA	NA	NA	NA	NA	NA	NA	NA	NA	NA	NA	NA	NA	NA	-0.776191	3.26081e-05
181	181	69	The impact of land degradation on the C pools in alpine grasslands of the Qinghai-Tibet Plateau	100.5	34.366	ED	meadow	0-4	NA	NA	-1.04455	0.00311302	-2.0149	0.135608	NA	NA	NA	NA	NA	NA	NA	NA	NA	NA	NA	NA	NA	NA	NA	-1.21343	0.00354911	NA	NA	NA	NA	NA	NA	NA	NA	NA	NA	NA	NA	NA	NA	NA	NA	-0.880764	3.55333e-05
182	182	70	The influence of degradation of the swamp and alpine meadows on CH4 and CO2 fluxes on the Qinghai-Tibetan Plateau	92.8949	34.728	ED	meadow	0-10	NA	NA	NA	NA	NA	NA	NA	NA	0.432864	0.00896676	0.151377	0.000575129	1.17219	NA	NA	NA	NA	NA	NA	NA	NA	-0.518689	0.00202448	-0.812797	0.00134341	-0.704967	0.00391288	NA	NA	NA	NA	NA	NA	NA	NA	-0.371948	0.00647962	-0.260333	0.0072021	NA	NA
183	183	71	The interaction between poisonous plants and soil quality in response to grassland degradation in the alpine region of the Qinghai-Tibetan Plateau	101.33	37.6	ED	meadow	0-5	NA	NA	NA	NA	NA	NA	NA	NA	0.160538	0.0238793	0.100209	0.000177544	0.8	NA	NA	1.03918	0.0125649	-0.393525	0.011305	NA	NA	-0.478468	0.00229851	-0.203512	0.00132372	-0.205852	0.000248305	NA	NA	NA	NA	NA	NA	NA	NA	NA	NA	NA	NA	NA	NA
184	184	72	The interaction between poisonous plants and soil quality in response to grassland degradation in the alpine region of the Qinghai-Tibetan Plateau	100.216	37.533	ED	steppe	0-5	NA	NA	NA	NA	NA	NA	NA	NA	0.210823	0.00362252	0.104236	0.000123643	0.88	NA	NA	0.398635	0.00576574	-0.305287	0.00273162	NA	NA	-0.521246	4.83079e-06	-0.729013	0.00193177	0.0504309	0.000905323	NA	NA	NA	NA	NA	NA	NA	NA	NA	NA	NA	NA	NA	NA
185	185	73	The response of soil macroinvertebrates to alpine meadow degradation in the Qinghai–Tibetan Plateau, Chi	102.133	32.9333	MD	meadow	0-30	-0.326522	0.00406788	-1.04752	NA	-2.08318	0.0881288	NA	NA	0	0.00205761	0.168335	0.000476151	1.1	0.140835	0.0158094	NA	NA	NA	NA	NA	NA	0.392431	0.00330085	NA	NA	NA	NA	0.134418	0.00174042	1.09861	0.0166193	-2.35527	NA	NA	NA	NA	NA	NA	NA	NA	NA
186	186	73	The response of soil macroinvertebrates to alpine meadow degradation in the Qinghai–Tibetan Plateau, Chi	102.133	32.9333	ED	meadow	0-30	-2.79321	0.0100167	-1.35455	NA	-3.06195	0.0731972	NA	NA	0.441833	0.00613085	0.348307	0.000277778	2.5	-1.90954	0.0155756	NA	NA	NA	NA	NA	NA	-2.75972	0.0153065	NA	NA	NA	NA	-1.46095	0.00649744	-0.861482	0.00607044	-4.26892	NA	NA	NA	NA	NA	NA	NA	NA	NA
187	187	74	不同退化演替阶段高寒草甸群落根土比和土壤理化特征分布格局	101.179	37.6652	LD	meadow	0-10	NA	NA	NA	NA	NA	NA	NA	NA	-0.514472	0.0069235	NA	NA	NA	0.491547	0.00305707	NA	NA	NA	NA	NA	NA	NA	NA	0.556068	0.00394817	-0.081678	0.00395997	NA	NA	0.501422	0.00288986	-0.266467	0.0142355	NA	NA	NA	NA	0.989718	0.107631	NA	NA
188	188	74	不同退化演替阶段高寒草甸群落根土比和土壤理化特征分布格局	101.179	37.6652	MD	meadow	0-10	NA	NA	NA	NA	NA	NA	NA	NA	-0.525568	0.00253769	NA	NA	NA	0.527685	0.00384791	NA	NA	NA	NA	NA	NA	NA	NA	0.62031	0.00354733	-0.0451204	0.003193	NA	NA	0.457391	0.00715086	-0.322885	0.00623803	NA	NA	NA	NA	0.916291	0.109574	NA	NA
189	189	75	川西北高寒草地退化对土壤团聚体组成及稳定性的影响	102.618	33.1797	LD	meadow	0-10	NA	NA	NA	NA	NA	NA	NA	NA	0.663294	0.0240634	0.110582	0.00161923	0.67	-1.51989	0.0200811	NA	NA	NA	NA	NA	NA	-1.42563	0.00196029	NA	NA	NA	NA	NA	NA	NA	NA	NA	NA	NA	NA	NA	NA	NA	NA	NA	NA
190	190	75	川西北高寒草地退化对土壤团聚体组成及稳定性的影响	102.618	33.1797	HD	meadow	0-10	NA	NA	NA	NA	NA	NA	NA	NA	0.663294	0.0225999	0.139838	0.00206715	0.86	-1.70278	0.0380434	NA	NA	NA	NA	NA	NA	-2.1219	0.022222	NA	NA	NA	NA	NA	NA	NA	NA	NA	NA	NA	NA	NA	NA	NA	NA	NA	NA
191	191	75	川西北高寒草地退化对土壤团聚体组成及稳定性的影响	102.618	33.1797	ED	meadow	0-10	NA	NA	NA	NA	NA	NA	NA	NA	0.722135	0.0212958	0.165307	0.00157692	1.03	-2.18957	0.0175789	NA	NA	NA	NA	NA	NA	-3.25303	0.0282679	NA	NA	NA	NA	NA	NA	NA	NA	NA	NA	NA	NA	NA	NA	NA	NA	NA	NA
192	192	76	高寒草甸草地退化对土壤水热性质的影响及其环境效应	92.92	34.82	MD	meadow	0-5	-0.239522	0.00740482	-0.0979337	0.00272202	-0.373544	0.00106761	0.0911902	0.000832441	0.295981	0.000363228	NA	NA	NA	NA	NA	NA	NA	NA	NA	NA	NA	-0.912071	0.00240714	NA	NA	NA	NA	NA	NA	NA	NA	NA	NA	NA	NA	NA	NA	NA	NA	NA	NA
193	193	77	高寒草原退化对植物群落及土壤理化性质的影响	97.9117	34.9117	LD	steppe	0-10	-0.212561	0.000399669	0.194869	0.00205631	NA	NA	-0.0492269	1.94636e-05	0.204794	0.00161319	-0.00255102	4.06111e-05	-0.02	-0.298708	0.00353362	NA	NA	NA	NA	NA	NA	-0.348094	0.0028487	-0.481535	0.000482607	-0.0303053	0.000225551	NA	NA	NA	NA	NA	NA	NA	NA	NA	NA	NA	NA	NA	NA
194	194	77	高寒草原退化对植物群落及土壤理化性质的影响	97.9117	34.9117	MD	steppe	0-10	-0.2948	0.000663032	-0.114153	0.00414518	NA	NA	0.107542	2.75582e-05	0.283126	0.00148897	-0.0012747	9.62312e-05	-0.01	-0.47132	0.00202059	NA	NA	NA	NA	NA	NA	-0.82791	0.00330636	-0.793566	0.00138945	0.0579873	0.00117008	NA	NA	NA	NA	NA	NA	NA	NA	NA	NA	NA	NA	NA	NA
195	195	77	高寒草原退化对植物群落及土壤理化性质的影响	97.9117	34.9117	HD	steppe	0-10	-0.750055	0.00488763	-0.379443	0.00423674	NA	NA	-0.956385	1.52552e-05	0.303466	0.00206854	-0.0808923	7.06108e-05	-0.61	0.207896	0.0018655	NA	NA	NA	NA	NA	NA	-0.531682	0.0110296	-0.441125	0.00322084	0.410428	0.00300147	NA	NA	NA	NA	NA	NA	NA	NA	NA	NA	NA	NA	NA	NA
196	196	77	高寒草原退化对植物群落及土壤理化性质的影响	97.9117	34.9117	ED	steppe	0-10	-1.72192	0.00875965	-0.520468	0.00451152	NA	NA	-1.01488	4.4287e-05	0.405465	0.00145638	-0.0906079	4.6461e-05	-0.68	-0.231194	0.0012381	NA	NA	NA	NA	NA	NA	-0.91645	0.00412293	-1.41866	0.00261365	-0.567106	0.00239428	NA	NA	NA	NA	NA	NA	NA	NA	NA	NA	NA	NA	NA	NA
197	197	78	江河源区退化高寒草地土壤微生物与地上植被及土壤环境的关系	100.034	34.5279	LD	meadow	0-10	-0.223144	0.00376697	NA	NA	NA	NA	-0.108951	0.047439	0.580261	0.00243296	0.0996431	0.000589828	0.68	-0.567535	0.00681495	NA	NA	NA	NA	NA	NA	-0.653748	0.000946334	-0.887317	0.000178616	-0.390242	0.00421472	-1.05793	0.0107487	NA	NA	NA	NA	NA	NA	NA	NA	NA	NA	NA	NA
198	198	78	江河源区退化高寒草地土壤微生物与地上植被及土壤环境的关系	100.034	34.5279	MD	meadow	0-10	-0.510826	0.00490008	NA	NA	NA	NA	-0.0875981	0.0453237	0.750722	0.00231475	0.121713	0.00113723	0.84	-0.692745	0.0027797	NA	NA	NA	NA	NA	NA	-0.942782	0.00104097	-0.961609	4.67222e-05	-0.253461	0.00385862	-1.29277	0.0074636	NA	NA	NA	NA	NA	NA	NA	NA	NA	NA	NA	NA
199	199	78	江河源区退化高寒草地土壤微生物与地上植被及土壤环境的关系	100.034	34.5279	HD	meadow	0-10	-0.693147	0.0122767	NA	NA	NA	NA	-0.0852534	0.0491889	0.787207	0.00236275	0.0137722	0.000502291	0.09	-0.627805	0.00347451	NA	NA	NA	NA	NA	NA	-1.00435	0.000869803	-1.22328	5.94316e-05	-0.553272	0.00324221	-1.48692	0.00643786	NA	NA	NA	NA	NA	NA	NA	NA	NA	NA	NA	NA
200	200	79	祁连山东段退化高寒草甸土壤水分入渗的变化及团聚体对水分入渗的影响	102.678	37.1847	LD	meadow	0-10	-0.305167	0.000103621	-0.53156	7.03532e-05	-0.687531	0.000351069	NA	NA	0.295845	0.000305925	NA	NA	NA	-0.68439	0.00011085	-0.198029	9.85871e-06	-0.139884	1.38908e-05	1.93515	0.000102004	-0.214343	0.000138383	NA	NA	NA	NA	NA	NA	NA	NA	NA	NA	NA	NA	NA	NA	NA	NA	NA	NA
201	201	79	祁连山东段退化高寒草甸土壤水分入渗的变化及团聚体对水分入渗的影响	102.678	37.1847	MD	meadow	0-10	-0.466809	0.000143145	-1.04842	0.000522573	-1.5514	0.000245254	NA	NA	0.295845	0.000305925	NA	NA	NA	-0.78785	9.99597e-05	-0.259123	1.06517e-05	-0.187307	3.46818e-05	2.14468	9.57988e-05	-0.389574	2.58627e-05	NA	NA	NA	NA	NA	NA	NA	NA	NA	NA	NA	NA	NA	NA	NA	NA	NA	NA
202	202	80	青藏高原高寒草甸退化对土壤氮素转化微生物基因的影响	91.0833	30.85	LD	meadow	0-20	NA	NA	NA	NA	NA	NA	NA	NA	NA	NA	NA	NA	NA	NA	NA	NA	NA	NA	NA	NA	NA	NA	NA	NA	NA	NA	NA	NA	NA	NA	NA	NA	NA	NA	NA	-0.400231	0.0131012	-0.593673	0.0149586	NA	NA
203	203	80	青藏高原高寒草甸退化对土壤氮素转化微生物基因的影响	91.0833	30.85	MD	meadow	0-20	NA	NA	NA	NA	NA	NA	NA	NA	NA	NA	NA	NA	NA	NA	NA	NA	NA	NA	NA	NA	NA	NA	NA	NA	NA	NA	NA	NA	NA	NA	NA	NA	NA	NA	NA	-0.743888	0.0177477	-1.09861	0.00889686	NA	NA
204	204	80	青藏高原高寒草甸退化对土壤氮素转化微生物基因的影响	91.0833	30.85	HD	meadow	0-20	NA	NA	NA	NA	NA	NA	NA	NA	NA	NA	NA	NA	NA	NA	NA	NA	NA	NA	NA	NA	NA	NA	NA	NA	NA	NA	NA	NA	NA	NA	NA	NA	NA	NA	NA	-0.846798	0.0149394	-1.44279	0.0145096	NA	NA
205	205	81	青藏高原退化草甸土壤微生物量、酶化学计量学特征及其影响因素	91.0833	51.85	LD	meadow	0-15	-0.12658	0.000104404	NA	NA	NA	NA	NA	NA	NA	NA	0.0336423	5.54639e-05	0.22	-0.0203338	0.00320248	NA	NA	NA	NA	NA	NA	-0.543483	0.0118551	-0.312788	0.00723373	NA	NA	NA	NA	0.10638	0.00682268	-0.0962254	0.0109281	-0.220051	0.00119269	NA	NA	NA	NA	-0.255289	0.00111958
206	206	81	青藏高原退化草甸土壤微生物量、酶化学计量学特征及其影响因素	91.0833	51.85	MD	meadow	0-15	-0.241355	7.49221e-05	NA	NA	NA	NA	NA	NA	NA	NA	0.0530026	5.00596e-05	0.35	-0.239878	0.00357096	NA	NA	NA	NA	NA	NA	-0.903982	0.0117632	-0.621403	0.00650381	NA	NA	NA	NA	-0.160121	0.00604399	-0.202496	0.0209607	-0.271296	0.00158086	NA	NA	NA	NA	-0.49967	0.00161886
207	207	81	青藏高原退化草甸土壤微生物量、酶化学计量学特征及其影响因素	91.0833	51.85	HD	meadow	0-15	-0.871654	0.000456735	NA	NA	NA	NA	NA	NA	NA	NA	0.0705469	0.000133701	0.47	-0.409757	0.00305866	NA	NA	NA	NA	NA	NA	-1.11942	0.0174151	-0.825499	0.0141642	NA	NA	NA	NA	-0.160121	0.0396917	-0.197692	0.0137991	-0.278974	0.00127247	NA	NA	NA	NA	-0.922953	0.00272996
208	208	82	青海湖流域矮嵩草草甸土壤有机碳密度分布特征	100.513	37.352	LD	meadow	0-10	-0.182322	0.00251029	NA	NA	NA	NA	NA	NA	0.0540672	0.0166739	NA	NA	NA	NA	NA	NA	NA	NA	NA	NA	NA	0.0405701	0.0944481	NA	NA	NA	NA	NA	NA	NA	NA	NA	NA	NA	NA	NA	NA	NA	NA	NA	NA
209	209	82	青海湖流域矮嵩草草甸土壤有机碳密度分布特征	100.513	37.352	MD	meadow	0-10	-0.325422	0.00300119	NA	NA	NA	NA	NA	NA	0.0671393	0.0138636	NA	NA	NA	NA	NA	NA	NA	NA	NA	NA	NA	-0.577881	0.110375	NA	NA	NA	NA	NA	NA	NA	NA	NA	NA	NA	NA	NA	NA	NA	NA	NA	NA
210	210	82	青海湖流域矮嵩草草甸土壤有机碳密度分布特征	100.513	37.352	HD	meadow	0-10	-0.730888	0.0025081	NA	NA	NA	NA	NA	NA	0.234193	0.0142778	NA	NA	NA	NA	NA	NA	NA	NA	NA	NA	NA	-1.33346	0.12951	NA	NA	NA	NA	NA	NA	NA	NA	NA	NA	NA	NA	NA	NA	NA	NA	NA	NA
[truncated: 32 more columns]
